# Supplementary material for: Volatile component analysis in infant formula using SPME coupled with GC×GC-TOFMS
Source: Royal Society of Chemistry journal article supplement (doi:10.1039/c9ay01473j), 2019-01-01
Supplement: c9ay01473j1.pdf [file c9ay01473j1.pdf]

## Supplementary material

Table S1 Information on 173 kinds of volatiles of infant formula from NIST retrieval

| No. | Compound                             | Formula  | R.T. (s)     | RI     | RI*  | Unique mass | Match |
|-----|--------------------------------------|----------|--------------|--------|------|-------------|-------|
| 1   | 3-methyl-1-butanol                   | C5H12O   | 292 , 3.920  | 832.2  | 697  | 70          | 803   |
| 2   | 2-ethyl-1-decanol                    | C12H26O  | 1088 , 1.150 | 1422.8 | 1393 | 57          | 800   |
| 3   | 1-heptanol                           | C7H16O   | 464 , 1.310  | 972.59 | 960  | 70          | 889   |
| 4   | 1-hexadecanol                        | C16H34O  | 1128 , 1.150 | 1454.7 | 1854 | 68          | 874   |
| 5   | 1-octanol                            | C8H18O   | 608 , 1.340  | 1074.6 | 1059 | 56          | 913   |
| 6   | 1-octen-3-ol                         | C8H16O   | 480 , 1.290  | 984.56 | 969  | 57          | 941   |
| 7   | 1-pentanol                           | C5H12O   | 252 , 3.500  | 777.07 | 761  | 41          | 884   |
| 8   | 2,4-decadien-1-OL                    | C10H18O  | 920 , 1.720  | 1295   | 1274 | 83          | 796   |
| 9   | Trans-2-Decen-1-OL                   | C10H20O  | 800 , 1.530  | 1208.5 | 1266 | 57          | 907   |
| 10  | Furfuryl alcohol                     | C5H6O2   | 324 , 1.300  | 859.68 | 885  | 81          | 925   |
| 11  | 3-octanol                            | C8H18O   | 504 , 1.270  | 1002.3 | 979  | 83          | 769   |
| 12  | 4-ethylcyclohexanol                  | C8H16O   | 560 , 1.340  | 1041.2 | 1068 | 58          | 840   |
| 13  | Cis-4-Heptenal                       | C7H12O   | 372 , 1.420  | 903.76 | 913  | 84          | 882   |
| 14  | (R)-(+)-2-methyl-1-phenyl-1-propanol | C10H14O  | 964 , 1.490  | 1327.9 | 1351 | 107         | 811   |
| 15  | 2-methylcyclohexanol                 | C7H14O   | 980 , 1.480  | 1340.1 | 969  | 57          | 822   |
| 16  | Phenethyl alcohol                    | C8H10O   | 672 , 1.470  | 1119.1 | 1136 | 91          | 939   |
| 17  | Dimethylsilanediol                   | C2H8O2Si | 240 , 1.050  | 743.38 | 409  | 77          | 921   |
| 18  | N-formylpiperidine                   | C6H11NO  | 716 , 2.370  | 1150.3 | 1021 | 113         | 864   |
| 19  | Gamma-nonanolactone                  | C9H16O2  | 1016 , 2.350 | 1368   | 1284 | 85          | 892   |
| 20  | Trans, Trans -2,4-decadienal         | C10H16O  | 1036 , 2.020 | 1382.9 | 1220 | 54          | 860   |
| 21  | (2E,4E)-2,4-decanedienal             | C10H16O  | 956 , 1.800  | 1298   | 1220 | 66          | 900   |
| 22  | (E,E)-2,4-dodecadienal               | C12H20O  | 1060 , 1.660 | 1400.8 | 1418 | 83          | 863   |
| 23  | Trans,trans-2,4-heptadienal          | C7H10O   | 416 , 1.530  | 1013.8 | 921  | 81          | 832   |
| 24  | (E,E)-2,4-hexadienal                 | C6H8O    | 392 , 1.750  | 918.99 | 822  | 81          | 910   |
| 25  | Trans,trans-2,4-nonadienal           | C9H14O   | 812 , 1.790  | 1217.3 | 1120 | 81          | 943   |
| 26  | (2E,4E)-2,4-octadienal               | C8H12O   | 664 , 1.820  | 1113.8 | 1021 | 81          | 861   |
| 27  | Crotonaldehyde                       | C4H6O    | 184 , 3.230  | 695.98 | 615  | 70          | 854   |
| 28  | Trans-2-dodecenal                    | C12H22O  | 1148 , 1.620 | 1471   | 1410 | 70          | 893   |
| 29  | 5-methyl furfural                    | C6H6O2   | 456 , 1.870  | 967.02 | 920  | 109         | 883   |
| 30  | 2-propyl-2-heptenal                  | C10H18O  | 904 , 1.590  | 1283.4 | 1189 | 125         | 780   |
| 31  | 2-ethyl-2-hexenal                    | C8H14O   | 516 , 1.590  | 1010.9 | 990  | 111         | 817   |
| 32  | (E)-2-Octenal                        | C8H14O   | 592 , 1.810  | 1063.8 | 1013 | 57          | 875   |
| 33  | (E)-2-butyloct-2-enal                | C12H22O  | 1028 , 1.550 | 1567.3 | 1023 | 111         | 755   |
| 34  | Trans-2-Pentenal                     | C5H8O    | 232 , 3.790  | 763.99 | 715  | 83          | 898   |
| 35  | 2-Furanacrolein                      | C7H6O2   | 668 , 1.930  | 1116.6 | 1038 | 122         | 823   |
| 36  | 2-Pyridinecarboxaldehyde             | C6H5NO   | 444 , 1.600  | 957.83 | 976  | 52          | 807   |
| 37  | 2-Undecenal                          | C11H20O  | 996 , 1.610  | 1367.5 | 1311 | 70          | 849   |
| 38  | Trans-2-Undecenal                    | C11H20O  | 1020 , 1.890 | 1370.7 | 1311 | 36          | 845   |

| No. | Compound                                                              | Formula  | R.T. (s)     | RI     | RI*  | Unique mass | Match |
|-----|-----------------------------------------------------------------------|----------|--------------|--------|------|-------------|-------|
| 39  | 3-Cyclohexene-1-carboxaldehyde                                        | C7H10O   | 536 , 1.670  | 1024.8 | 1008 | 110         | 829   |
| 40  | 3-Furaldehyde                                                         | C5H4O2   | 292 , 1.060  | 829.52 | 831  | 95          | 912   |
| 41  | 3-Hexen-2-One                                                         | C6H10O   | 308 , 1.580  | 844.98 | 762  | 83          | 820   |
| 42  | Trans-4-Nonenal                                                       | C9H16O   | 644 , 1.510  | 1099.7 | 924  | 69          | 889   |
| 43  | 5-ethyl-2-furaldehyde                                                 | C7H8O2   | 584 , 1.850  | 1058.3 | 1020 | 109         | 962   |
| 44  | 5-Norbornene-2-carboxaldehyde                                         | C8H10O   | 776 , 1.640  | 1191.5 | 973  | 66          | 821   |
| 45  | Benzaldehyde                                                          | C7H6O    | 416 , 1.740  | 966.84 | 982  | 106         | 828   |
| 46  | 2-Ethylbenzaldehyde                                                   | C9H10O   | 720 , 1.600  | 1152.6 | 1195 | 133         | 836   |
| 47  | Salicylaldehyde                                                       | C7H6O2   | 576 , 1.580  | 1052.5 | 1203 | 122         | 928   |
| 48  | 4-Ethylbenzaldehyde                                                   | C9H10O   | 744 , 1.670  | 1169.3 | 1195 | 105         | 862   |
| 49  | Anisic aldehyde                                                       | C8H8O2   | 876 , 1.850  | 1263.4 | 1171 | 135         | 825   |
| 50  | Phenylacetaldehyde                                                    | C8H8O    | 572 , 1.680  | 1049.8 | 1081 | 91          | 874   |
| 51  | Trans-Cinnamaldehyde                                                  | C9H8O    | 900 , 1.860  | 1280.7 | 1189 | 131         | 798   |
| 52  | Cis-4-Decenal                                                         | C10H18O  | 788 , 1.510  | 1199.8 | 1212 | 41          | 901   |
| 53  | (Z)-4-Undecenal                                                       | C11H20O  | 928 , 1.490  | 1300.7 | 1123 | 84          | 864   |
| 54  | Dodecyl aldehyde                                                      | C12H24O  | 1072 , 1.470 | 1410.3 | 1402 | 82          | 943   |
| 55  | Furfural                                                              | C5H4O2   | 300 , 1.550  | 859.88 | 831  | 66          | 953   |
| 56  | Heptaldehyde                                                          | C7H14O   | 376 , 1.480  | 906.8  | 905  | 70          | 933   |
| 57  | Caproaldehyde                                                         | C6H12O   | 260 , 3.950  | 817.89 | 806  | 56          | 907   |
| 58  | 1-Nonanal                                                             | C9H18O   | 656 , 1.600  | 1108.1 | 1104 | 98          | 824   |
| 59  | Octanal                                                               | C8H16O   | 512 , 1.560  | 1008.1 | 1005 | 57          | 865   |
| 60  | Valeraldehyde                                                         | C5H10O   | 200 , 0.530  | 718.45 | 707  | 41          | 827   |
| 61  | (E)-4-Undecenal                                                       | C11H20O  | 1120 , 2.290 | 1449.2 | 1158 | 84          | 773   |
| 62  | Undecanal                                                             | C11H22O  | 940 , 1.490  | 1309.8 | 1303 | 56          | 954   |
| 63  | Trans-2-Octenoic acid                                                 | C8H14O2  | 820 , 1.570  | 1222.9 | 1199 | 73          | 906   |
| 64  | 2-Hydroxycinnamic acid                                                | C9H8O3   | 1120 , 2.170 | 1449.1 | 1577 | 118         | 903   |
| 65  | Acetic acid glacial                                                   | C2H4O2   | 188 , 3.060  | 763.38 | 576  | 59          | 896   |
| 66  | Benzoic acid                                                          | C7H6O2   | 904 , 1.260  | 1219.9 | 1150 | 105         | 767   |
| 67  | (3R,4S)-1-Benzoyl-3-(1-methoxy-1-methylethoxy)-4-phenyl-2-azetidinone | C4H8O2   | 376 , 1.100  | 807.2  | 2640 | 60          | 788   |
| 68  | Isovaleric acid                                                       | C5H10O2  | 344 , 1.230  | 878.33 | 811  | 74          | 812   |
| 69  | Geranic acid                                                          | C10H16O2 | 1016 , 1.450 | 1367.3 | 1342 | 69          | 829   |
| 70  | Heptanoic acid                                                        | C7H14O2  | 620 , 1.480  | 1083   | 1073 | 60          | 927   |
| 71  | Hexanoic acid                                                         | C6H12O2  | 520 , 1.600  | 1013.7 | 974  | 60          | 906   |
| 72  | Capric acid                                                           | C10H20O2 | 1020 , 1.550 | 1403.8 | 1372 | 129         | 824   |
| 73  | Nonanoic acid                                                         | C9H18O2  | 892 , 1.430  | 1283.4 | 1272 | 60          | 883   |
| 74  | Octanoic acid                                                         | C8H16O2  | 764 , 1.490  | 1183.1 | 1173 | 60          | 929   |
| 75  | Valeric acid                                                          | C5H10O2  | 396 , 1.260  | 889.72 | 875  | 60          | 916   |
| 76  | Propionic acid                                                        | C3H6O2   | 244 , 1.030  | 730.15 | 676  | 74          | 897   |
| 77  | Trans-2-Decenoic acid                                                 | C10H18O2 | 1020 , 1.490 | 1370.4 | 1380 | 86          | 817   |
| 78  | Delta-Nonalactone                                                     | C9H16O2  | 1052 , 2.380 | 1395.3 | 1304 | 99          | 836   |

| No. | Compound                        | Formula      | R.T. (s)     | RI     | RI*  | Unique mass | Match |
|-----|---------------------------------|--------------|--------------|--------|------|-------------|-------|
| 79  | Gamma-Octanoic lactone          | C8H14O2      | 872 , 2.460  | 1261   | 1184 | 85          | 882   |
| 80  | 4-Hexanolide                    | C6H10O2      | 584 , 2.660  | 1058.8 | 986  | 85          | 926   |
| 81  | G-Decalactone                   | C10H18O<br>2 | 1148 , 2.220 | 1471.5 | 1383 | 85          | 817   |
| 82  | 4-hydroxyoxolan-2-one           | C4H6O3       | 736 , 2.610  | 1164.4 | 879  | 44          | 834   |
| 83  | 4-Heptanolide                   | C7H12O2      | 724 , 2.580  | 1156   | 1085 | 85          | 871   |
| 84  | Dihydroactinidiolide            | C11H16O<br>2 | 1232 , 2.850 | 1541.4 | 1426 | 111         | 845   |
| 85  | δ -Lauro lactone                | C12H22O<br>2 | 1428 , 2.070 | 1712.7 | 1602 | 99          | 882   |
| 86  | 5-Hexanolide                    | C6H10O2      | 644 , 2.840  | 1100.6 | 1006 | 42          | 856   |
| 87  | 5-Decanolide                    | C10H18O<br>2 | 1180 , 2.270 | 1497   | 1404 | 99          | 846   |
| 88  | 5-Hydroxyoctanoic acid lactone  | C8H14O2      | 912 , 2.500  | 1289.8 | 1205 | 99          | 867   |
| 89  | (3Z)-3-Hexenyl benzoate         | C13H16O<br>2 | 1276 , 1.430 | 1577.4 | 1565 | 67          | 840   |
| 90  | Vinyl acetate                   | C4H6O2       | 344 , 1.940  | 878.99 | 576  | 43          | 881   |
| 91  | Hexyl benzoate                  | C13H18O<br>2 | 1284 , 1.430 | 1584.2 | 1557 | 105         | 863   |
| 92  | Butyl benzoate                  | C11H14O<br>2 | 1032 , 1.490 | 1379.5 | 1359 | 105         | 915   |
| 93  | Dibutyl phthalate               | C16H22O<br>4 | 1680 , 1.600 | 1958.5 | 2037 | 149         | 938   |
| 94  | Diethyl phthalate               | C12H14O<br>4 | 1292 , 1.760 | 1591.2 | 1639 | 149         | 907   |
| 95  | Dimethyl phthalate              | C10H10O<br>4 | 1124 , 1.880 | 1452.1 | 1440 | 163         | 896   |
| 96  | Heptylformiat                   | C8H16O2      | 544 , 1.440  | 1030.2 | 1081 | 70          | 929   |
| 97  | Methyl isoheptadecanoate        | C18H36O<br>2 | 1444 , 1.310 | 1727   | 1914 | 74          | 784   |
| 98  | Pentyl hexanoate                | C11H22O<br>2 | 912 , 1.380  | 1289   | 1282 | 43          | 874   |
| 99  | Methyl salicylate               | C8H8O3       | 788 , 1.560  | 1199.8 | 1281 | 120         | 930   |
| 100 | Hexanoic acid vinyl ester       | C8H14O2      | 592 , 1.820  | 1063.8 | 974  | 99          | 864   |
| 101 | Methyl 14-Methyl pentadecanoate | C17H34O<br>2 | 1648 , 1.290 | 1925.2 | 1814 | 74          | 885   |
| 102 | Cis-4-Decene                    | C10H20       | 1044 , 1.140 | 1388.3 | 1023 | 70          | 797   |
| 103 | Decane                          | C10H22       | 648 , 1.110  | 1536.5 | 1015 | 57          | 908   |
| 104 | 3-Methyldecane                  | C11H24       | 1060 , 1.140 | 1400.4 | 1051 | 57          | 887   |
| 105 | Dodecane                        | C12H26       | 792 , 1.120  | 1502.7 | 1214 | 57          | 936   |
| 106 | Heptane                         | C7H16        | 204 , 3.000  | 723.67 | 717  | 70          | 776   |
| 107 | 1-Chloroheptane                 | C7H15Cl      | 452 , 1.240  | 1066.2 | 942  | 91          | 851   |
| 108 | N-Octane                        | C8H18        | 372 , 3.400  | 809.05 | 816  | 43          | 813   |
| 109 | 1,2-Epoxyheptane                | C7H14O       | 380 , 1.350  | 909.7  | 807  | 58          | 853   |
| 110 | 1-Chloropentane                 | C5H11Cl      | 232 , 3.220  | 763.19 | 743  | 70          | 872   |
| 111 | 1-Nitropropane                  | C3H7NO2      | 204 , 2.420  | 722.86 | 701  | 43          | 840   |
| 112 | n-Tridecane                     | C13H28       | 932 , 1.130  | 1303.4 | 1313 | 57          | 908   |
| 113 | 3-Methyltridecane               | C14H30       | 1024 , 1.140 | 1373.1 | 1349 | 57          | 879   |

| No. | Compound                                            | Formula      | R.T. (s)     | RI     | RI*  | Unique mass | Match |
|-----|-----------------------------------------------------|--------------|--------------|--------|------|-------------|-------|
| 114 | 1-Octen-3-one                                       | C8H14O       | 476 , 1.530  | 981.75 | 943  | 70          | 819   |
| 115 | 2(5H)-Furanone                                      | C4H4O2       | 400 , 2.640  | 925.65 | 807  | 55          | 948   |
| 116 | Beta-Angelica Lactone                               | C5H6O2       | 432 , 2.700  | 949.66 | 868  | 55          | 845   |
| 117 | 2-Cyclohexen-1-one                                  | C6H8O        | 420 , 1.840  | 940.03 | 873  | 68          | 945   |
| 118 | 2-Cyclopentenone                                    | C5H6O        | 304 , 1.690  | 841.34 | 753  | 82          | 897   |
| 119 | 2-Decanone                                          | C10H20O      | 780 , 1.590  | 1194.3 | 1151 | 58          | 872   |
| 120 | 2-Dodecanone                                        | C12H24O      | 1180 , 1.490 | 1496.4 | 1350 | 58          | 872   |
| 121 | 2-Heptanone                                         | C7H14O       | 364 , 1.520  | 897.31 | 853  | 58          | 937   |
| 122 | 3-Methyl-5-Hexanone                                 | C7H14O       | 492 , 1.610  | 993.79 | 799  | 58          | 798   |
| 123 | 2-Hexanoylfuran                                     | C10H14O<br>2 | 792 , 1.670  | 1202.8 | 1275 | 110         | 871   |
| 124 | Alpha-Pyrone                                        | C5H4O2       | 476 , 2.310  | 982.33 | 909  | 68          | 894   |
| 125 | 5-Hydroxy-2-Decenoic acid Lactone                   | C10H16O<br>2 | 1160 , 2.300 | 1481.1 | 1386 | 97          | 852   |
| 126 | Delta-Heptalactone                                  | C7H12O2      | 776 , 2.640  | 1192.2 | 1105 | 99          | 813   |
| 127 | 2-N-Hexylcyclopentanone                             | C11H20O      | 704 , 1.660  | 1141.5 | 1329 | 84          | 836   |
| 128 | 2-Nonanone                                          | C9H18O       | 636 , 1.620  | 1094.2 | 1052 | 58          | 894   |
| 129 | Hydroxyacetone                                      | C3H6O2       | 212 , 3.500  | 735.57 | 698  | 43          | 904   |
| 130 | 3-Decanone                                          | C10H20O      | 772 , 1.530  | 1188.7 | 1151 | 57          | 848   |
| 131 | 3-Nonen-2-one                                       | C9H16O       | 704 , 1.760  | 1141.6 | 1060 | 55          | 860   |
| 132 | 3-Octen-2-One                                       | C8H14O       | 560 , 1.790  | 1041.6 | 960  | 55          | 907   |
| 133 | Trans-3-Penten-2-one                                | C5H8O        | 220 , 1.400  | 743.84 | 662  | 69          | 893   |
| 134 | 3-Tridecanone                                       | C13H26O      | 1172 , 1.450 | 1490   | 1499 | 72          | 804   |
| 135 | 4-Cyclopentene-1,3-Dione                            | C5H4O2       | 356 , 2.010  | 890.28 | 958  | 96          | 883   |
| 136 | 2,3-Dihydro-3,5-dihydroxy-6-methyl-4(H)-pyran-4-one | C6H8O4       | 716 , 1.580  | 1149.8 | 1269 | 101         | 842   |
| 137 | 4-Octanone                                          | C8H16O       | 468 , 1.520  | 975.75 | 952  | 58          | 795   |
| 138 | 6,10-Dimethyl-5,9-undecadien-2-one                  | C13H22O      | 1120 , 1.510 | 1448.6 | 1446 | 43          | 823   |
| 139 | 2-Methylacetophenone                                | C9H10O       | 776 , 1.750  | 1191.6 | 1142 | 119         | 839   |
| 140 | Levogluosenone                                      | C6H6O3       | 668 , 2.220  | 1116.8 | 993  | 98          | 816   |
| 141 | 3-Hydroxy-2-methyl-4H-pyran-4-one                   | C6H6O3       | 668 , 1.900  | 1116.6 | 1063 | 126         | 840   |
| 142 | 4'-Hydroxypropiophenone                             | C9H10O2      | 912 , 1.730  | 1289.3 | 1349 | 121         | 828   |
| 143 | Ethyl-O-Tolyl ketone                                | C10H12O      | 876 , 1.640  | 1263.3 | 1257 | 119         | 813   |
| 144 | 4-(2,6,6-Trimethyl-1-cyclohexenyl)-3-buten-2-one    | C13H20O      | 1168 , 1.680 | 1487   | 1556 | 177         | 834   |
| 145 | Ocimene                                             | C10H16       | 572 , 1.170  | 1049.5 | 976  | 93          | 864   |
| 146 | 1-Decene                                            | C10H20       | 968 , 1.510  | 1331   | 1005 | 140         | 825   |
| 147 | (+)- $\alpha$ -funebrene                            | C15H24       | 1096 , 1.240 | 1429.2 | 999  | 119         | 845   |
| 148 | 1-(2-methyl-1-cyclopentenyl)ethanone                | C8H12O       | 656 , 1.890  | 1108.3 | 996  | 109         | 856   |
| 149 | 4-Chlorophenol                                      | C6H5ClO      | 796 , 1.370  | 1205.5 | 1081 | 128         | 861   |
| 150 | 2-Ethyl-6-Methylphenol                              | C9H12O       | 580 , 1.250  | 1055.1 | 1227 | 121         | 798   |

| No. | Compound                     | Formula | R.T. (s)     | RI     | RI*  | Unique mass | Match |
|-----|------------------------------|---------|--------------|--------|------|-------------|-------|
| 151 | 1-(2-Furyl)Butan-1-one       | C8H10O2 | 648 , 1.680  | 1102.6 | 1077 | 110         | 865   |
| 152 | 2-Methyl-5-Propionyl-Furan   | C8H10O2 | 600 , 1.520  | 1069.1 | 1067 | 109         | 823   |
| 153 | 5-Methyl-2-acetylfuran       | C7H8O2  | 1000 , 1.460 | 1355.2 | 967  | 109         | 832   |
| 154 | 2-Butylfuran                 | C8H12O  | 360 , 3.670  | 895.58 | 941  | 81          | 903   |
| 155 | 2-N-Heptylfuran              | C11H18O | 780 , 1.220  | 1194   | 1239 | 81          | 918   |
| 156 | 3-Acetyl-2,5-Dimethylfuran   | C8H10O2 | 680 , 1.840  | 1172.3 | 1057 | 123         | 796   |
| 157 | Dibenzofuran                 | C12H8O  | 1220 , 1.460 | 1530   | 1483 | 168         | 864   |
| 158 | 2-Ethylbenzofuran            | C10H10O | 920 , 1.430  | 1294.8 | 1207 | 131         | 852   |
| 159 | 2-(2-Propenyl)furan          | C7H8O   | 544 , 1.870  | 1030.5 | 1460 | 77          | 834   |
| 160 | 2-Ethylfuran                 | C6H8O   | 200 , 3.070  | 718.17 | 742  | 81          | 816   |
| 161 | 2-Ethyl-5-Methyl Furan       | C7H10O  | 388 , 1.730  | 915.98 | 831  | 110         | 843   |
| 162 | 2-Hexylfuran                 | C10H16O | 636 , 1.220  | 1093.9 | 1139 | 81          | 882   |
| 163 | 2-Pentylfuran                | C9H14O  | 492 , 1.200  | 993.48 | 1040 | 53          | 776   |
| 164 | 2-Propylfuran                | C7H10O  | 552 , 1.720  | 1008.2 | 841  | 110         | 861   |
| 165 | 2,3-Dimethylmaleic anhydride | C6H6O3  | 552 , 3.010  | 1036.9 | 1158 | 54          | 910   |
| 166 | Butylbenzene                 | C10H14  | 592 , 1.230  | 1063.4 | 1092 | 134         | 895   |
| 167 | Phenylpentane                | C11H16  | 732 , 1.250  | 1160.7 | 1191 | 92          | 811   |
| 168 | Butyric anhydride            | C8H14O3 | 336 , 3.680  | 873.13 | 1120 | 71          | 879   |
| 169 | 1,7-Dimethylnaphthalene      | C12H12  | 1096 , 1.430 | 1429.4 | 1458 | 141         | 897   |
| 170 | 1-Methylnaphthalene          | C11H10  | 936 , 1.430  | 1306.7 | 1345 | 142         | 911   |
| 171 | O-Cymene                     | C10H14  | 544 , 1.190  | 1030   | 1042 | 119         | 917   |
| 172 | 2-N-Hexylthiophene           | C10H16S | 884 , 1.250  | 1268.8 | 1292 | 97          | 855   |
| 173 | 2-N-Pentylthiophene          | C9H14S  | 740 , 1.250  | 1166.2 | 1192 | 97          | 867   |

RI: retention time; RI\*:RI in NIST

Table S2 The relative content of volatiles in six infant formula(n=3).

| No. | Compound                             | Infant formula |                     |                    |        |        |         |        |        |        |        |        |        |
|-----|--------------------------------------|----------------|---------------------|--------------------|--------|--------|---------|--------|--------|--------|--------|--------|--------|
|     |                                      | 1              |                     | 2                  |        | 3      |         | 4      |        | 5      |        | 6      |        |
| 1   | 3-methyl-1-butanol                   | 98.23          | ± 4.07              | 10.82              | ± 0.30 | ND     |         | 76.29  | ± 1.27 | 20.75  | ± 0.20 | 94.21  | ± 4.43 |
| 2   | 2-ethyl-1-decanol                    | 102.05         | ± 4.53              | ND                 |        | 369.87 | ± 10.38 | ND     |        | ND     |        | ND     |        |
| 3   | 1-heptanol                           | 105.01         | ± 6.63              | 80.98              | ± 2.87 | 50.40  | ± 2.36  | 32.12  | ± 0.93 | 31.92  | ± 0.09 | 26.70  | ± 0.36 |
| 4   | 1-hexadecanol                        | 101.67         | ± 2.57              | 151.3 <sub>8</sub> | ± 1.41 | 123.40 | ± 4.07  | 125.64 | ± 1.78 | 57.92  | ± 1.40 | 89.80  | ± 1.67 |
| 5   | 1-octanol                            | 101.04         | ± 3.16              | 94.66              | ± 3.22 | 70.19  | ± 0.72  | 3.75   | ± 0.01 | 2.57   | ± 0.04 | 21.78  | ± 0.08 |
| 6   | 1-octen-3-ol                         | 101.67         | ± 2.49              | 96.84              | ± 0.87 | 64.91  | ± 1.16  | 46.28  | ± 1.59 | 45.53  | ± 0.41 | 47.90  | ± 1.50 |
| 7   | 1-pentanol                           | 100.24         | ± 1.39              | 83.54              | ± 1.54 | 51.39  | ± 1.16  | 69.57  | ± 0.88 | ND     |        | 70.66  | ± 1.32 |
| 8   | 2,4-decadien-1-OL                    | 91.65          | ± 9.73              | 62.01              | ± 2.12 | 13.51  | ± 0.73  | 65.47  | ± 1.42 | 36.28  | ± 1.50 | 21.78  | ± 1.10 |
| 9   | Trans-2-Decen-1-OL                   | 104.39         | ± 4.79              | 77.26              | ± 2.89 | 40.67  | ± 0.35  | 56.68  | ± 1.78 | 57.68  | ± 1.98 | 55.81  | ± 1.11 |
| 10  | Furfuryl alcohol                     | 109.12         | ± 9.82              | 108.5 <sub>1</sub> | ± 0.40 | 118.99 | ± 5.47  | 151.03 | ± 2.89 | 62.84  | ± 1.38 | 63.34  | ± 2.03 |
| 11  | 3-octanol                            | 97.09          | ± 3.79              | 71.81              | ± 3.44 | ND     |         | 99.92  | ± 3.92 | 127.67 | ± 5.69 | 126.60 | ± 0.95 |
| 12  | 4-ethylcyclohexanol                  | 109.43         | ± 10.8 <sub>5</sub> | 99.18              | ± 3.52 | 8.41   | ± 0.16  | 21.19  | ± 0.43 | 133.32 | ± 0.71 | 7.90   | ± 0.14 |
| 13  | Cis-4-Heptenal                       | 96.93          | ± 4.79              | 74.85              | ± 1.88 | 38.89  | ± 0.35  | 102.96 | ± 3.24 | 18.84  | ± 0.65 | 156.99 | ± 1.21 |
| 14  | (R)-(+)-2-methyl-1-phenyl-1-propanol | 107.23         | ± 7.43              | ND                 |        | ND     |         | 44.45  | ± 1.60 | ND     |        | 19.31  | ± 0.79 |

| No. | Compound                     | Infant formula |        |                    |                      |        |         |        |                     |        |        |        |                     |
|-----|------------------------------|----------------|--------|--------------------|----------------------|--------|---------|--------|---------------------|--------|--------|--------|---------------------|
|     |                              | 1              |        | 2                  |                      | 3      |         | 4      |                     | 5      |        | 6      |                     |
| 15  | 2-methylcyclohexanol         | 99.09          | ± 4.00 | 67.24              | ± 1.52               | 9.51   | ± 0.23  | 8.31   | ± 0.19              | 85.35  | ± 2.41 | 3.27   | ± 0.13              |
| 16  | Phenethyl alcohol            | 98.27          | ± 3.71 | 44.66              | ± 0.70               | 28.44  | ± 0.16  | 21.67  | ± 0.02              | 17.37  | ± 0.15 | 13.19  | ± 0.26              |
| 17  | Dimethylsilanediol           | 94.35          | ± 6.11 | ND                 |                      | ND     |         | ND     |                     | 57.56  | ± 1.59 | 19.62  | ± 0.68              |
| 18  | N-formylpiperidine           | 92.51          | ± 8.58 | 281.9 <sub>1</sub> | ± 7.78               | 310.52 | ± 3.25  | 132.22 | ± 2.88              | 94.98  | ± 1.44 | 88.87  | ± 1.25              |
| 19  | Gamma-nonanolactone          | 96.18          | ± 4.96 | 98.64              | ± 4.19               | 28.46  | ± 0.59  | 38.43  | ± 0.56              | 40.97  | ± 0.28 | 39.88  | ± 1.00              |
| 20  | Trans, Trans -2,4-decadienal | 104.52         | ± 4.80 | 4068.08            | ± 154.6 <sub>8</sub> | 373.78 | ± 10.86 | 742.96 | ± 7.42              | 706.51 | ± 7.37 | 494.01 | ± 21.1 <sub>2</sub> |
| 21  | (2E,4E)-2,4-decanedial       | 102.66         | ± 3.28 | 23.74              | ± 0.72               | 1.84   | ± 0.02  | 3.33   | ± 0.15              | 3.50   | ± 0.14 | 2.58   | ± 0.07              |
| 22  | (E,E)-2,4-dodecadienal       | 103.88         | ± 4.18 | 48.28              | ± 0.88               | 10.14  | ± 0.15  | 18.09  | ± 0.38              | 13.32  | ± 0.05 | 10.58  | ± 0.16              |
| 23  | Trans,trans-2,4-heptadienal  | 97.20          | ± 4.25 | 0.05               | ± 0.00               | 43.63  | ± 1.49  | 51.98  | ± 2.56              | 41.22  | ± 0.51 | 28.24  | ± 0.45              |
| 24  | (E,E)-2,4-hexadienal         | 102.86         | ± 4.67 | 119.9 <sub>3</sub> | ± 2.99               | 54.54  | ± 0.69  | 46.54  | ± 0.90              | 19.06  | ± 0.05 | 7.10   | ± 0.17              |
| 25  | Trans,trans-2,4-nonadienal   | 103.45         | ± 3.39 | 860.2 <sub>2</sub> | ± 13.91              | 363.94 | ± 14.02 | 493.60 | ± 17.9 <sub>4</sub> | 384.99 | ± 7.80 | 192.71 | ± 4.31              |
| 26  | (2E,4E)-2,4-octadienal       | 102.42         | ± 3.79 | 83.23              | ± 3.71               | 33.94  | ± 1.54  | 36.10  | ± 0.76              | 25.07  | ± 0.02 | 19.37  | ± 0.36              |
| 27  | Crotonaldehyde               | 97.56          | ± 4.96 | 102.9 <sub>6</sub> | ± 2.90               | 91.82  | ± 1.58  | 48.35  | ± 1.80              | ND     |        | ND     |                     |
| 28  | Trans-2-dodecenal            | 104.09         | ± 5.28 | 57.36              | ± 1.72               | 4.70   | ± 0.14  | 18.08  | ± 0.37              | 10.81  | ± 0.06 | 7.52   | ± 0.18              |

| No. | Compound                       | Infant formula |        |                    |         |         |         |         |                     |         |         |        |        |
|-----|--------------------------------|----------------|--------|--------------------|---------|---------|---------|---------|---------------------|---------|---------|--------|--------|
|     |                                | 1              |        | 2                  |         | 3       |         | 4       |                     | 5       |         | 6      |        |
| 29  | 5-methyl furfural              | 104.59         | ± 5.86 | 129.8 <sub>8</sub> | ± 3.64  | 80.28   | ± 0.47  | 67.85   | ± 0.73              | 69.28   | ± 1.14  | 80.30  | ± 1.69 |
| 30  | 2-propyl-2-heptenal            | 97.49          | ± 3.53 | 443.9 <sub>0</sub> | ± 4.88  | 142.23  | ± 6.44  | 3.54    | ± 0.14              | 122.23  | ± 3.03  | 151.97 | ± 1.02 |
| 31  | 2-ethyl-2-hexenal              | 96.38          | ± 5.16 | 335.4 <sub>3</sub> | ± 5.30  | 167.10  | ± 7.23  | 77.52   | ± 3.90              | 54.85   | ± 0.28  | 0.72   | ± 0.00 |
| 32  | (E)-2-Octenal                  | 103.46         | ± 5.38 | 126.5 <sub>4</sub> | ± 2.88  | 107.84  | ± 4.19  | 1101.98 | ± 16.9 <sub>1</sub> | ND      |         | 343.10 | ± 5.33 |
| 33  | (E)-2-butyl-2-enal             | 99.55          | ± 0.63 | 301.4 <sub>1</sub> | ± 3.49  | ND      |         | 73.79   | ± 2.26              | 26.65   | ± 0.41  | ND     |        |
| 34  | Trans-2-Pentenal               | 102.47         | ± 3.49 | 78.81              | ± 3.25  | 49.17   | ± 1.42  | 2.35    | ± 0.05              | 54.10   | ± 0.78  | ND     |        |
| 35  | 2-Furanacrolein                | 94.73          | ± 7.12 | 116.2 <sub>9</sub> | ± 1.20  | 14.05   | ± 0.02  | 27.83   | ± 1.16              | 475.44  | ± 1.64  | 13.17  | ± 0.65 |
| 36  | 2-Pyridinecarboxaldehyde       | 97.54          | ± 3.47 | 1154.75            | ± 13.94 | 3121.38 | ± 71.04 | 47.01   | ± 1.89              | 37.96   | ± 0.62  | 23.91  | ± 1.23 |
| 37  | 2-Undecenal                    | 106.59         | ± 8.59 | 123.7 <sub>3</sub> | ± 0.99  | 29.28   | ± 0.42  | 45.41   | ± 0.36              | 17.55   | ± 0.04  | 24.36  | ± 0.59 |
| 38  | Trans-2-Undecenal              | 105.34         | ± 7.75 | 95.24              | ± 1.03  | 30.87   | ± 0.24  | 23.49   | ± 1.07              | 216.41  | ± 5.52  | ND     |        |
| 39  | 3-Cyclohexene-1-carboxaldehyde | 108.69         | ± 9.17 | 97.04              | ± 1.94  | 37.15   | ± 0.34  | ND      |                     | 1360.34 | ± 55.96 | ND     |        |
| 40  | 3-Furaldehyde                  | 92.16          | ± 8.19 | 666.3 <sub>6</sub> | ± 11.25 | ND      |         | ND      |                     | ND      |         | 17.21  | ± 0.69 |
| 41  | 3-Hexen-2-One                  | 98.64          | ± 1.91 | 95.04              | ± 4.69  | 38.71   | ± 0.18  | ND      |                     | 126.83  | ± 0.55  | ND     |        |



| No. | Compound                      | Infant formula |        |                    |        |        |        |        |                     |        |        |        |        |
|-----|-------------------------------|----------------|--------|--------------------|--------|--------|--------|--------|---------------------|--------|--------|--------|--------|
|     |                               | 1              |        | 2                  |        | 3      |        | 4      |                     | 5      |        | 6      |        |
| 42  | Trans-4-Nonenal               | 99.80          | ± 3.98 | 91.44              | ± 0.85 | 29.87  | ± 0.66 | ND     |                     | 90.35  | ± 3.32 | ND     |        |
| 43  | 5-ethyl-2-furaldehyde         | 94.86          | ± 8.93 | 146.0 <sub>9</sub> | ± 7.04 | 78.90  | ± 2.73 | 13.65  | ± 0.14              | 15.21  | ± 0.70 | 10.79  | ± 0.37 |
| 44  | 5-Norbornene-2-carboxaldehyde | 107.92         | ± 7.45 | 55.76              | ± 2.53 | 14.19  | ± 0.49 | 9.18   | ± 0.17              | ND     |        | 16.76  | ± 0.36 |
| 45  | Benzaldehyde                  | 98.98          | ± 2.23 | 75.88              | ± 1.81 | 98.90  | ± 3.05 | 106.49 | ± 3.68              | 82.58  | ± 0.50 | 77.84  | ± 0.92 |
| 46  | 2-Ethylbenzaldehyde           | 98.88          | ± 3.23 | 139.5 <sub>8</sub> | ± 0.85 | 99.87  | ± 0.17 | 94.95  | ± 3.77              | 50.57  | ± 2.29 | 84.16  | ± 0.41 |
| 47  | Salicylaldehyde               | 102.15         | ± 3.55 | 100.1 <sub>1</sub> | ± 1.28 | 50.55  | ± 0.18 | 46.46  | ± 1.76              | 25.42  | ± 0.47 | 38.11  | ± 1.48 |
| 48  | 4-Ethylbenzaldehyde           | 102.45         | ± 3.77 | 110.1 <sub>1</sub> | ± 2.13 | 31.83  | ± 0.50 | 84.49  | ± 1.42              | 121.25 | ± 1.75 | 41.19  | ± 0.38 |
| 49  | Anisic aldehyde               | 96.24          | ± 4.38 | 154.1 <sub>6</sub> | ± 4.76 | 118.52 | ± 2.93 | 411.74 | ± 10.8 <sub>3</sub> | 10.76  | ± 0.42 | 202.67 | ± 1.53 |
| 50  | Phenylacetaldehyde            | 97.58          | ± 3.40 | 40.76              | ± 0.57 | 22.77  | ± 0.76 | ND     |                     | 11.02  | ± 0.01 | ND     |        |
| 51  | Trans-Cinnamaldehyde          | 98.78          | ± 3.28 | 152.1 <sub>8</sub> | ± 4.74 | 65.71  | ± 1.45 | 10.62  | ± 0.06              | 144.68 | ± 0.33 | 113.36 | ± 4.76 |
| 52  | Cis-4-Decenal                 | 91.20          | ± 2.81 | 26.93              | ± 1.02 | 8.05   | ± 0.33 | 373.44 | ± 2.32              | 4.64   | ± 0.14 | 61.74  | ± 1.57 |
| 53  | (Z)-4-Undecenal               | 100.20         | ± 1.59 | 21.60              | ± 0.24 | 2.28   | ± 0.09 | 6.46   | ± 0.24              | 5.29   | ± 0.16 | 9.02   | ± 0.30 |
| 54  | Dodecyl aldehyde              | 102.13         | ± 2.49 | 126.6 <sub>4</sub> | ± 0.69 | 52.41  | ± 2.59 | 166.85 | ± 4.28              | 106.33 | ± 2.96 | 97.64  | ± 0.78 |

| No. | Compound                                                              | Infant formula |        |       |        |       |        |        |        |        |        |        |        |        |        |   |
|-----|-----------------------------------------------------------------------|----------------|--------|-------|--------|-------|--------|--------|--------|--------|--------|--------|--------|--------|--------|---|
|     |                                                                       | 1              |        | 2     |        | 3     |        | 4      |        | 5      |        | 6      |        |        |        |   |
| 55  | Furfural                                                              | 102.58         | ± 4.80 | ND    |        | ND    |        | ND     |        | ND     |        | 209.17 | ± 10.5 | 6      |        |   |
| 56  | Heptaldehyde                                                          | 92.03          | ± 8.70 | 80.46 | ± 1.39 | 61.82 | ± 1.02 | 19.88  | ± 0.54 | 31.98  | ± 1.12 | 36.75  | ± 1.03 |        |        |   |
| 57  | Caproaldehyde                                                         | 97.82          | ± 4.93 | ND    |        | ND    |        | 75.68  | ± 0.53 | 110.21 | ± 4.09 | ND     |        |        |        |   |
| 58  | 1-Nonanal                                                             | 91.09          | ± 9.12 | 68.43 | ± 1.91 | 71.46 | ± 2.25 | 52.48  | ± 0.14 | 60.65  | ± 0.90 | 53.67  | ± 0.09 |        |        |   |
| 59  | Octanal                                                               | 100.03         | ± 3.76 | 71.88 | ± 0.31 | 31.55 | ± 1.32 | 53.62  | ± 2.27 | 61.95  | ± 2.16 | 52.93  | ± 2.24 |        |        |   |
| 60  | Valeraldehyde                                                         | 98.63          | ± 3.28 | 52.82 | ± 0.70 | 30.97 | ± 0.69 | 49.12  | ± 1.29 | 41.05  | ± 1.11 | 34.33  | ± 1.31 |        |        |   |
| 61  | (E)-4-Undecenal                                                       | 102.95         | ± 2.53 | 96.20 | ± 3.50 | 24.28 | ± 0.12 | 31.10  | ± 1.35 | 24.38  | ± 0.45 | 18.63  | ± 0.10 |        |        |   |
| 62  | Undecanal                                                             | 102.23         | ± 5.50 | 121.5 | ± 0.17 | 2     | ± 0.72 | 53.13  | ± 0.72 | 100.04 | ± 3.29 | 70.40  | ± 0.23 | 72.21  | ± 1.85 |   |
| 63  | Ttrans-2-Octenoic acid                                                | 99.71          | ± 4.45 | 93.35 | ± 4.35 | 1.67  | ± 0.01 | 40.63  | ± 1.23 | 8.56   | ± 0.32 | 17.65  | ± 0.26 |        |        |   |
| 64  | 2-Hydroxycinnamic acid                                                | 107.89         | ± 7.90 | 67.31 | ± 2.28 | 27.51 | ± 0.40 | 570.04 | ± 23.4 | 6      | ± 0.68 | 40.74  | ± 0.68 | 494.75 | ± 14.3 | 7 |
| 65  | Acetic acid glacial                                                   | 94.75          | ± 6.74 | 26.16 | ± 0.69 | 3.69  | ± 0.08 | ND     |        | 103.90 | ± 3.20 | ND     |        |        |        |   |
| 66  | Benzoic acid                                                          | 97.80          | ± 4.69 | 13.15 | ± 0.39 | 13.61 | ± 0.39 | 28.75  | ± 1.54 | 70.81  | ± 2.44 | ND     |        |        |        |   |
| 67  | (3R,4S)-1-Benzoyl-3-(1-methoxy-1-methylethoxy)-4-phenyl-2-azetidinone | 102.55         | ± 4.75 | 219.7 | ± 2.40 | 5     | ± 3.62 | 158.01 | ± 3.62 | 78.73  | ± 0.00 | 39.83  | ± 0.21 | 104.69 | ± 1.00 |   |
| 68  | Isovaleric acid                                                       | 102.35         | ± 3.29 | 113.6 | ± 2.41 | ND    |        | 21.96  | ± 1.00 | 64.27  | ± 0.44 | ND     |        |        |        |   |

| No. | Compound               | Infant formula |                           |               |                            |               |               |  |  |  |  |
|-----|------------------------|----------------|---------------------------|---------------|----------------------------|---------------|---------------|--|--|--|--|
|     |                        | 1              | 2                         | 3             | 4                          | 5             | 6             |  |  |  |  |
| 69  | Geranic acid           | 104.27 ± 5.20  | 142.0 <sub>9</sub> ± 6.56 | ND            | 50.07 ± 1.53               | 52.09 ± 1.39  | ND            |  |  |  |  |
| 70  | Heptanoic acid         | 102.37 ± 3.27  | 246.3 <sub>8</sub> ± 6.58 | 133.64 ± 5.97 | 241.42 ± 10.9 <sub>2</sub> | 67.04 ± 1.59  | 105.13 ± 4.76 |  |  |  |  |
| 71  | Hexanoic acid          | 96.87 ± 4.07   | 194.4 <sub>3</sub> ± 5.23 | 25.12 ± 0.88  | ND                         | ND            | 112.08 ± 3.46 |  |  |  |  |
| 72  | Capric acid            | 102.72 ± 4.22  | 80.37 ± 0.86              | 34.33 ± 1.68  | 129.12 ± 3.22              | ND            | 110.78 ± 5.61 |  |  |  |  |
| 73  | Nonanoic acid          | 92.50 ± 8.65   | ND                        | ND            | ND                         | 7.83 ± 0.26   | ND            |  |  |  |  |
| 74  | Octanoic acid          | 102.61 ± 4.75  | 92.52 ± 2.76              | 68.87 ± 2.47  | ND                         | ND            | ND            |  |  |  |  |
| 75  | Valeric acid           | 102.93 ± 4.98  | 114.7 <sub>8</sub> ± 3.79 | 43.37 ± 0.70  | 60.18 ± 1.38               | 42.80 ± 0.17  | ND            |  |  |  |  |
| 76  | Propionic acid         | 102.66 ± 3.26  | ND                        | ND            | ND                         | ND            | ND            |  |  |  |  |
| 77  | Trans-2-Decenoic acid  | 97.97 ± 3.08   | ND                        | 230.69 ± 8.64 | ND                         | ND            | ND            |  |  |  |  |
| 78  | Delta-Nonalactone      | 102.00 ± 4.37  | 94.05 ± 4.42              | 16.40 ± 0.06  | 32.41 ± 1.49               | 29.73 ± 1.37  | 26.06 ± 0.32  |  |  |  |  |
| 79  | Gamma-Octanoic lactone | 106.70 ± 5.76  | 88.62 ± 0.16              | 25.77 ± 0.35  | 54.98 ± 1.90               | 51.10 ± 1.89  | 50.94 ± 1.83  |  |  |  |  |
| 80  | 4-Hexanolide           | 96.45 ± 4.15   | 125.4 <sub>0</sub> ± 5.75 | 61.44 ± 0.74  | 65.93 ± 1.90               | 60.54 ± 0.41  | 64.56 ± 0.70  |  |  |  |  |
| 81  | G-Decalactone          | 101.05 ± 2.93  | 179.7 <sub>6</sub> ± 8.12 | 44.00 ± 1.44  | 204.78 ± 2.32              | 128.99 ± 4.33 | 114.41 ± 0.38 |  |  |  |  |
| 82  | 4-hydroxyoxolan-2-     | 102.58 ± 2.75  | ND                        | ND            | ND                         | ND            | ND            |  |  |  |  |

| No. | Compound                       | Infant formula |        |            |        |       |        |        |        |        |        |        |        |
|-----|--------------------------------|----------------|--------|------------|--------|-------|--------|--------|--------|--------|--------|--------|--------|
|     |                                | 1              |        | 2          |        | 3     |        | 4      |        | 5      |        | 6      |        |
|     | one                            |                |        |            |        |       |        |        |        |        |        |        |        |
| 83  | 4-Heptanolide                  | 100.99         | ± 4.59 | 155.7<br>9 | ± 0.76 | 74.33 | ± 1.18 | 63.78  | ± 0.26 | 54.67  | ± 0.33 | 56.34  | ± 1.73 |
| 84  | Dihydroactinidiolide           | 96.61          | ± 4.43 | 124.1<br>9 | ± 1.68 | 87.35 | ± 3.61 | 154.85 | ± 5.06 | 186.91 | ± 6.36 | 196.38 | ± 6.92 |
| 85  | δ-Laurolactone                 | 102.39         | ± 3.79 | 193.8<br>5 | ± 3.17 | 7.02  | ± 0.24 | 138.40 | ± 4.29 | 22.09  | ± 0.37 | 107.37 | ± 3.22 |
| 86  | 5-Hexanolide                   | 97.21          | ± 3.77 | 118.7<br>7 | ± 4.15 | 83.90 | ± 0.03 | 104.97 | ± 4.08 | 97.22  | ± 2.91 | 23.73  | ± 0.52 |
| 87  | 5-Decanolide                   | 101.13         | ± 1.90 | 154.8<br>6 | ± 1.01 | 93.71 | ± 2.81 | 142.52 | ± 6.42 | ND     |        | 90.67  | ± 1.73 |
| 88  | 5-Hydroxyoctanoic acid lactone | 98.28          | ± 4.84 | ND         |        | ND    |        | ND     |        | 50.46  | ± 1.48 | 48.26  | ± 1.94 |
| 89  | (3Z)-3-Hexenyl benzoate        | 99.85          | ± 1.38 | 41.12      | ± 0.22 | ND    |        | 45.74  | ± 1.65 | ND     |        | 58.26  | ± 0.85 |
| 90  | Vinyl acetate                  | 102.89         | ± 4.27 | ND         |        | ND    |        | 91.88  | ± 2.58 | 109.42 | ± 1.41 | 79.61  | ± 3.54 |
| 91  | Hexyl benzoate                 | 102.45         | ± 4.65 | 52.92      | ± 1.19 | ND    |        | 84.99  | ± 4.19 | 121.25 | ± 4.29 | 69.49  | ± 2.74 |
| 92  | Butyl benzoate                 | 96.56          | ± 4.90 | 176.5<br>9 | ± 7.12 | 80.66 | ± 1.89 | 154.44 | ± 4.65 | 13.51  | ± 0.60 | 140.55 | ± 5.96 |
| 93  | Dibutyl phthalate              | 103.76         | ± 4.67 | 49.92      | ± 1.67 | 20.37 | ± 0.43 | 578.36 | ± 0.53 | 70.15  | ± 3.18 | 288.02 | ± 7.93 |
| 94  | Diethyl phthalate              | 102.78         | ± 3.65 | 147.5<br>0 | ± 6.36 | 66.50 | ± 2.60 | 179.76 | ± 1.05 | 55.66  | ± 0.26 | 102.05 | ± 3.00 |
| 95  | Dimethyl phthalate             | 101.08         | ± 2.84 | 151.4<br>6 | ± 6.19 | 58.48 | ± 0.86 | 85.21  | ± 3.62 | 79.71  | ± 1.41 | 57.28  | ± 2.53 |

| No. | Compound                        | Infant formula |        |                    |         |        |        |        |        |        |        |        |        |
|-----|---------------------------------|----------------|--------|--------------------|---------|--------|--------|--------|--------|--------|--------|--------|--------|
|     |                                 | 1              |        | 2                  |         | 3      |        | 4      |        | 5      |        | 6      |        |
| 96  | Heptylformiat                   | 92.64          | ± 8.35 | 36.17              | ± 0.67  | 19.06  | ± 0.71 | 37.08  | ± 0.96 | 29.34  | ± 0.50 | 22.74  | ± 0.51 |
| 97  | Methyl isoheptadecanoate        | 97.14          | ± 4.06 | 815.6 <sub>1</sub> | ± 29.34 | 107.65 | ± 2.81 | 125.41 | ± 5.70 | ND     |        | 48.13  | ± 0.14 |
| 98  | Pentyl hexanoate                | 103.25         | ± 5.69 | 71.06              | ± 0.68  | ND     |        | ND     |        | ND     |        | ND     |        |
| 99  | Methyl salicylate               | 95.63          | ± 5.81 | 38.57              | ± 0.06  | 19.85  | ± 0.17 | 291.43 | ± 7.44 | 113.98 | ± 4.79 | 8.87   | ± 0.27 |
| 100 | Hexanoic acid vinyl ester       | 94.61          | ± 8.97 | 111.6 <sub>7</sub> | ± 4.39  | 26.31  | ± 0.92 | 42.41  | ± 1.32 | 36.72  | ± 0.64 | 32.06  | ± 0.60 |
| 101 | Methyl 14-Methyl pentadecanoate | 104.22         | ± 5.56 | 67.87              | ± 1.63  | 22.80  | ± 0.53 | 40.23  | ± 0.07 | 20.25  | ± 0.22 | 17.38  | ± 0.88 |
| 102 | Cis-4-Decene                    | 102.49         | ± 2.64 | 306.4 <sub>9</sub> | ± 7.18  | 230.05 | ± 1.86 | 4.63   | ± 0.16 | 6.97   | ± 0.03 | 2.50   | ± 0.03 |
| 103 | Decane                          | 101.81         | ± 3.83 | 239.1 <sub>8</sub> | ± 10.63 | 309.59 | ± 5.01 | 252.31 | ± 4.31 | 45.95  | ± 1.90 | 137.54 | ± 4.78 |
| 104 | 3-Methyldecane                  | 103.21         | ± 4.01 | 354.6 <sub>1</sub> | ± 10.48 | 256.41 | ± 8.23 | 85.00  | ± 0.21 | 16.82  | ± 0.16 | 42.70  | ± 1.34 |
| 105 | Dodecane                        | 99.95          | ± 1.31 | 244.1 <sub>6</sub> | ± 8.29  | 156.18 | ± 1.54 | 87.80  | ± 2.20 | 143.98 | ± 2.73 | 92.18  | ± 1.79 |
| 106 | Heptane                         | 96.98          | ± 4.27 | 42.72              | ± 1.89  | 34.92  | ± 1.20 | ND     |        | ND     |        | 23.06  | ± 0.17 |
| 107 | 1-Chloroheptane                 | 99.03          | ± 3.45 | ND                 |         | ND     |        | 92.69  | ± 0.59 | 105.95 | ± 1.14 | ND     |        |
| 108 | N-Octane                        | 98.82          | ± 3.74 | 22.53              | ± 0.69  | 1.24   | ± 0.06 | 1.38   | ± 0.01 | ND     |        | 3.47   | ± 0.07 |
| 109 | 1,2-Epoxyheptane                | 104.30         | ± 4.25 | 25.60              | ± 0.22  | 11.08  | ± 0.15 | 22.57  | ± 0.16 | ND     |        | ND     |        |

| No. | Compound              | Infant formula |        |                    |        |        |        |        |        |        |        |        |                     |
|-----|-----------------------|----------------|--------|--------------------|--------|--------|--------|--------|--------|--------|--------|--------|---------------------|
|     |                       | 1              |        | 2                  |        | 3      |        | 4      |        | 5      |        | 6      |                     |
| 110 | 1-Chloropentane       | 102.12         | ± 4.42 | 45.11              | ± 0.51 | 20.68  | ± 0.77 | 35.99  | ± 0.32 | 41.62  | ± 0.32 | 39.81  | ± 1.52              |
| 111 | 1-Nitropropane        | 99.63          | ± 1.14 | ND                 |        | ND     |        | ND     |        | ND     |        | ND     |                     |
| 112 | n-Tridecane           | 104.12         | ± 4.57 | 195.7 <sub>8</sub> | ± 0.27 | 289.42 | ± 3.85 | 270.57 | ± 8.34 | 134.81 | ± 0.65 | 198.79 | ± 8.58              |
| 113 | 3-Methyltridecane     | 97.76          | ± 2.76 | 360.6 <sub>5</sub> | ± 9.52 | 567.85 | ± 2.54 | 459.50 | ± 5.91 | 176.04 | ± 2.43 | 308.06 | ± 10.3 <sub>3</sub> |
| 114 | 1-Octen-3-one         | 102.73         | ± 4.13 | 102.2 <sub>1</sub> | ± 0.80 | 127.28 | ± 3.79 | 148.68 | ± 4.38 | 138.64 | ± 1.77 | 163.55 | ± 4.27              |
| 115 | 2(5H)-Furanone        | 98.77          | ± 2.69 | ND                 |        | ND     |        | ND     |        | ND     |        | ND     |                     |
| 116 | Beta-Angelica Lactone | 101.76         | ± 4.98 | ND                 |        | ND     |        | ND     |        | ND     |        | ND     |                     |
| 117 | 2-Cyclohexen-1-one    | 97.32          | ± 3.39 | 60.02              | ± 1.54 | 38.66  | ± 0.76 | 25.65  | ± 0.71 | 26.48  | ± 0.49 | 17.87  | ± 0.24              |
| 118 | 2-Cyclopentenone      | 101.14         | ± 2.21 | 60.07              | ± 1.33 | 20.49  | ± 0.73 | 63.19  | ± 1.48 | 87.69  | ± 0.43 | 115.67 | ± 5.21              |
| 119 | 2-Decanone            | 100.08         | ± 0.53 | 87.31              | ± 0.26 | 45.22  | ± 1.45 | 70.89  | ± 0.42 | 63.56  | ± 0.33 | 92.91  | ± 0.95              |
| 120 | 2-Dodecanone          | 99.79          | ± 4.81 | 144.6 <sub>3</sub> | ± 4.94 | 83.14  | ± 2.71 | 97.67  | ± 2.18 | 26.44  | ± 1.02 | 29.42  | ± 0.54              |
| 121 | 2-Heptanone           | 107.54         | ± 8.02 | 85.17              | ± 0.17 | 45.33  | ± 1.54 | 52.41  | ± 2.38 | 149.30 | ± 2.14 | 156.50 | ± 0.63              |
| 122 | 3-Methyl-5-Hexanone   | 97.06          | ± 3.87 | 109.4 <sub>9</sub> | ± 0.40 | 81.77  | ± 3.99 | 96.21  | ± 3.98 | 31.17  | ± 0.88 | 27.82  | ± 0.85              |
| 123 | 2-Hexanoylfuran       | 98.99          | ± 4.09 | 122.8 <sub>9</sub> | ± 3.24 | 16.99  | ± 0.19 | 36.52  | ± 0.53 | 94.17  | ± 5.01 | 99.57  | ± 0.90              |
| 124 | Alpha-Pyrone          | 102.27         | ± 4.34 | 227.3              | ± 1.01 | 24.13  | ± 0.89 | 65.03  | ± 0.62 | 93.65  | ± 1.88 | 53.84  | ± 0.12              |

| No. | Compound                          | Infant formula |        |            |         |        |        |        |             |        |         |        |             |
|-----|-----------------------------------|----------------|--------|------------|---------|--------|--------|--------|-------------|--------|---------|--------|-------------|
|     |                                   | 1              |        | 2          |         | 3      |        | 4      |             | 5      |         | 6      |             |
|     |                                   |                |        | 4          |         |        |        |        |             |        |         |        |             |
| 125 | 5-Hydroxy-2-Decenoic acid Lactone | 92.85          | ± 9.42 | 303.6<br>6 | ± 13.67 | 154.20 | ± 1.86 | 114.66 | ± 3.05      | 29.27  | ± 1.04  | 95.29  | ± 3.20      |
| 126 | Delta-Heptalactone                | 101.46         | ± 2.00 | 122.1<br>9 | ± 4.56  | 69.85  | ± 0.41 | 106.34 | ± 3.46      | 83.48  | ± 3.49  | 26.05  | ± 0.48      |
| 127 | 2-N-Hexylcyclopentanone           | 93.78          | ± 8.30 | 59.27      | ± 2.28  | 15.86  | ± 0.53 | 14.97  | ± 0.30      | 58.36  | ± 1.20  | 59.43  | ± 2.00      |
| 128 | 2-Nonanone                        | 103.34         | ± 4.00 | 118.2<br>0 | ± 0.86  | 108.18 | ± 2.41 | 69.99  | ± 0.72      | 604.32 | ± 21.28 | 82.84  | ± 1.45      |
| 129 | Hydroxyacetone                    | 101.73         | ± 2.16 | ND         |         | ND     |        | 113.93 | ± 5.09      | 16.42  | ± 0.10  | 41.28  | ± 1.32      |
| 130 | 3-Decanone                        | 97.22          | ± 3.91 | 145.3<br>2 | ± 7.27  | 36.86  | ± 1.50 | 272.94 | ± 1.58      | 15.76  | ± 0.16  | ND     |             |
| 131 | 3-Nonen-2-one                     | 102.41         | ± 3.32 | 160.0<br>3 | ± 5.07  | 72.33  | ± 1.36 | ND     |             | 120.38 | ± 1.66  | ND     |             |
| 132 | 3-Octen-2-One                     | 106.22         | ± 8.73 | 153.1<br>9 | ± 5.77  | 177.06 | ± 5.37 | 69.92  | ± 0.54      | 16.19  | ± 0.66  | 108.29 | ± 3.92      |
| 133 | trans-3-Penten-2-one              | 96.39          | ± 5.68 | 223.0<br>2 | ± 5.60  | 81.11  | ± 1.55 | 51.21  | ± 1.69      | 807.65 | ± 20.07 | 21.38  | ± 0.94      |
| 134 | 3-Tridecanone                     | 97.68          | ± 4.35 | 33.69      | ± 0.79  | 27.69  | ± 1.10 | 745.47 | ± 21.6<br>8 | 22.13  | ± 0.87  | 728.02 | ± 15.3<br>8 |
| 135 | 4-Cyclopentene-1,3-Dione          | 102.50         | ± 2.90 | 191.0<br>7 | ± 7.20  | 223.76 | ± 8.91 | 21.26  | ± 0.05      | 10.29  | ± 0.20  | 42.00  | ± 1.27      |
| 136 | 2,3-Dihydro-3,5-dihydroxy-6-      | 103.03         | ± 3.75 | 155.3      | ± 0.63  | 123.30 | ± 1.69 | 16.73  | ± 0.86      | ND     |         | 13.16  | ± 0.37      |

| No. | Compound                                         | Infant formula            |                           |                |                            |                |               |  |  |  |  |
|-----|--------------------------------------------------|---------------------------|---------------------------|----------------|----------------------------|----------------|---------------|--|--|--|--|
|     |                                                  | 1                         | 2                         | 3              | 4                          | 5              | 6             |  |  |  |  |
|     |                                                  |                           | 8                         |                |                            |                |               |  |  |  |  |
| 137 | methyl-4(H)-pyran-4-one<br>4-Octanone            | 94.62 ± 6.72              | 57.25 ± 0.40              | ND             | 140.25 ± 4.69              | 62.54 ± 0.12   | 103.34 ± 2.51 |  |  |  |  |
| 138 | 6,10-Dimethyl-5,9-undecadien-2-one               | 98.07 ± 4.27              | 91.74 ± 0.81              | 66.37 ± 2.06   | 77.70 ± 2.72               | 12.06 ± 0.44   | 51.92 ± 0.68  |  |  |  |  |
| 139 | 2-Methylacetophenone                             | 92.44 ± 8.11              | 134.2 <sub>3</sub> ± 2.84 | 52.31 ± 1.57   | 25.98 ± 0.08               | ND             | ND            |  |  |  |  |
| 140 | Levogluconone                                    | 95.37 ± 6.75              | ND                        | 26.63 ± 1.20   | 316.13 ± 14.5 <sub>2</sub> | 585.66 ± 12.55 | ND            |  |  |  |  |
| 141 | 3-Hydroxy-2-methyl-4H-pyran-4-one                | 95.16 ± 5.57              | 206.8 <sub>2</sub> ± 8.73 | 400.85 ± 5.10  | 16.98 ± 0.79               | 9.34 ± 0.30    | 643.36 ± 7.69 |  |  |  |  |
| 142 | 4'-Hydroxypropiophenone                          | 96.63 ± 4.01              | 159.9 <sub>9</sub> ± 0.50 | 45.02 ± 0.70   | 75.71 ± 3.71               | 58.91 ± 0.17   | 47.19 ± 1.74  |  |  |  |  |
| 143 | Ethyl-O-Tolyl ketone                             | 96.04 ± 6.38              | 88.79 ± 1.91              | 14.54 ± 0.09   | 25.39 ± 0.99               | 18.08 ± 0.27   | ND            |  |  |  |  |
| 144 | 4-(2,6,6-Trimethyl-1-cyclohexenyl)-3-buten-2-one | 96.96 ± 7.20              | 102.7 <sub>1</sub> ± 2.79 | 92.24 ± 4.39   | 162.82 ± 5.97              | 193.34 ± 7.02  | 144.08 ± 0.24 |  |  |  |  |
| 145 | Ocimene                                          | 92.43 ± 10.6 <sub>2</sub> | 38.65 ± 0.87              | 26.50 ± 0.89   | ND                         | ND             | ND            |  |  |  |  |
| 146 | 1-Decene                                         | 103.68 ± 5.92             | ND                        | ND             | ND                         | ND             | ND            |  |  |  |  |
| 147 | (+)-Alpha-Funebrene                              | 101.60 ± 2.09             | 331.8 <sub>2</sub> ± 4.46 | 501.33 ± 12.97 | 170.38 ± 1.05              | 80.18 ± 0.37   | 103.17 ± 4.73 |  |  |  |  |
| 148 | 1-(2-methyl-1-cyclopentenyl)eth                  | 99.98 ± 0.25              | 137.0 <sub>9</sub> ± 3.02 | 100.87 ± 3.22  | 155.84 ± 0.24              | 16.90 ± 0.01   | 115.09 ± 0.40 |  |  |  |  |



| No. | Compound                   | Infant formula            |                           |               |               |               |               |  |  |  |  |
|-----|----------------------------|---------------------------|---------------------------|---------------|---------------|---------------|---------------|--|--|--|--|
|     |                            | 1                         | 2                         | 3             | 4             | 5             | 6             |  |  |  |  |
|     | anone                      |                           |                           |               |               |               |               |  |  |  |  |
| 149 | 4-Chlorophenol             | 97.95 ± 4.51              | 202.3 <sub>7</sub> ± 0.17 | ND            | 14.41 ± 0.72  | 110.49 ± 2.19 | 17.76 ± 0.88  |  |  |  |  |
| 150 | 2-Ethyl-6-Methylphenol     | 96.85 ± 4.72              | 69.43 ± 3.53              | 14.43 ± 0.51  | 12.90 ± 0.20  | 20.63 ± 0.64  | 13.74 ± 0.01  |  |  |  |  |
| 151 | 1-(2-Furyl)Butan-1-one     | 104.72 ± 5.45             | 53.69 ± 0.43              | 62.17 ± 1.76  | 62.76 ± 0.89  | 22.54 ± 0.81  | ND            |  |  |  |  |
| 152 | 2-Methyl-5-Propionyl-Furan | 105.89 ± 7.45             | 104.2 <sub>0</sub> ± 0.52 | 36.80 ± 1.83  | 31.17 ± 0.51  | 22.00 ± 0.61  | 21.62 ± 0.90  |  |  |  |  |
| 153 | 5-Methyl-2-acetylfuran     | 100.90 ± 1.69             | 116.3 <sub>7</sub> ± 2.15 | 12.87 ± 0.15  | 20.02 ± 0.44  | 11.08 ± 0.06  | 10.05 ± 0.26  |  |  |  |  |
| 154 | 2-Butylfuran               | 103.72 ± 4.50             | 123.2 <sub>7</sub> ± 1.18 | 74.76 ± 0.43  | 60.69 ± 1.79  | 37.19 ± 1.24  | 28.44 ± 1.38  |  |  |  |  |
| 155 | 2-N-Heptylfuran            | 107.87 ± 8.85             | 66.86 ± 1.52              | 25.95 ± 0.15  | 42.38 ± 0.05  | 14.72 ± 0.09  | 10.36 ± 0.49  |  |  |  |  |
| 156 | 3-Acetyl-2,5-Dimethylfuran | 91.10 ± 9.56              | 121.0 <sub>5</sub> ± 2.26 | 30.02 ± 0.10  | 158.42 ± 6.62 | ND            | 182.76 ± 5.98 |  |  |  |  |
| 157 | Dibenzofuran               | 96.07 ± 7.90              | 105.7 <sub>2</sub> ± 5.24 | 73.03 ± 1.43  | 28.66 ± 0.73  | 265.14 ± 1.30 | 14.12 ± 0.09  |  |  |  |  |
| 158 | 2-Ethylbenzofuran          | 90.92 ± 10.9 <sub>5</sub> | 70.66 ± 3.58              | 11.50 ± 0.26  | ND            | ND            | ND            |  |  |  |  |
| 159 | 2-(2-Propenyl)furan        | 93.91 ± 9.21              | 70.91 ± 0.20              | 37.56 ± 0.66  | 31.39 ± 0.60  | 212.56 ± 1.70 | 11.84 ± 0.10  |  |  |  |  |
| 160 | 2-Ethylfuran               | 104.40 ± 4.02             | 88.09 ± 3.11              | 31.74 ± 1.27  | 152.54 ± 3.54 | 67.90 ± 0.61  | 250.19 ± 0.51 |  |  |  |  |
| 161 | 2-Ethyl-5-Methyl Furan     | 104.44 ± 5.48             | 127.0 <sub>7</sub> ± 1.64 | 118.73 ± 4.13 | 68.47 ± 0.18  | 57.76 ± 0.97  | 54.72 ± 0.28  |  |  |  |  |

| No. | Compound                     | Infant formula |                     |                    |         |        |         |         |                     |        |        |        |                     |
|-----|------------------------------|----------------|---------------------|--------------------|---------|--------|---------|---------|---------------------|--------|--------|--------|---------------------|
|     |                              | 1              |                     | 2                  |         | 3      |         | 4       |                     | 5      |        | 6      |                     |
| 162 | 2-Hexylfuran                 | 107.56         | ± 8.66              | 158.3 <sub>4</sub> | ± 3.11  | 75.24  | ± 2.89  | 51.46   | ± 0.45              | 16.54  | ± 0.26 | 51.63  | ± 1.72              |
| 163 | 2-Pentylfuran                | 101.65         | ± 4.71              | 89.63              | ± 2.42  | 68.47  | ± 3.34  | ND      |                     | 491.71 | ± 5.88 | ND     |                     |
| 164 | 2-Propylfuran                | 91.41          | ± 9.78              | 34.16              | ± 1.76  | ND     |         | 39.31   | ± 0.64              | 143.71 | ± 1.72 | 929.86 | ± 15.4 <sub>1</sub> |
| 165 | 2,3-Dimethylmaleic anhydride | 108.45         | ± 8.88              | 121.3 <sub>5</sub> | ± 2.34  | 83.33  | ± 0.74  | 115.43  | ± 5.26              | 56.25  | ± 2.46 | 46.97  | ± 1.06              |
| 166 | Butylbenzene                 | 95.72          | ± 5.17              | 58.19              | ± 0.92  | 25.90  | ± 1.00  | 65.30   | ± 3.10              | 29.08  | ± 0.74 | 56.83  | ± 2.78              |
| 167 | Phenylpentane                | 100.87         | ± 1.77              | 105.8 <sub>9</sub> | ± 3.68  | 50.17  | ± 0.23  | 36.56   | ± 1.09              | ND     |        | 29.44  | ± 0.97              |
| 168 | Butyric anhydride            | 109.70         | ± 10.1 <sub>1</sub> | ND                 |         | ND     |         | 210.00  | ± 7.00              | 168.68 | ± 1.82 | 78.06  | ± 4.08              |
| 169 | 1,7-Dimethylnaphthalene      | 98.67          | ± 4.84              | 342.4 <sub>6</sub> | ± 11.57 | 202.82 | ± 4.97  | 181.37  | ± 3.95              | 80.34  | ± 3.02 | 127.35 | ± 4.14              |
| 170 | 1-Methylnaphthalene          | 99.41          | ± 3.25              | 262.5 <sub>6</sub> | ± 2.35  | 206.90 | ± 4.00  | 88.67   | ± 2.12              | 85.25  | ± 2.52 | 89.90  | ± 1.11              |
| 171 | O-Cymene                     | 101.21         | ± 3.66              | 56.79              | ± 0.36  | 24.02  | ± 0.78  | 28.42   | ± 1.05              | 13.10  | ± 0.21 | 14.55  | ± 0.24              |
| 172 | 2-N-Hexylthiophene           | 95.38          | ± 6.24              | 58.32              | ± 3.05  | 651.64 | ± 23.14 | 1219.95 | ± 53.4 <sub>4</sub> | 38.60  | ± 0.35 | 11.83  | ± 0.40              |
| 173 | 2-N-Pentylthiophene          | 104.98         | ± 5.25              | 58.60              | ± 0.48  | 81.95  | ± 2.07  | 55.44   | ± 0.29              | 112.71 | ± 3.34 | 97.27  | ± 2.62              |

ND: Non- detected

Table S3 Component matrix of six infant formula

| No. | Compound                             | Principal components |         |         |         |         |
|-----|--------------------------------------|----------------------|---------|---------|---------|---------|
|     |                                      | 1                    | 2       | 3       | 4       | 5       |
| 1   | 3-methyl-1-butanol                   | -0.6565              | -0.0343 | -0.0845 | 0.1626  | -0.1466 |
| 2   | 2-ethyl-1-decanol                    | -0.9836              | -0.1337 | -0.2480 | 0.1576  | -0.1308 |
| 3   | 1-heptanol                           | -0.4502              | 0.4820  | -0.0944 | 0.0865  | 0.1366  |
| 4   | 1-hexadecanol                        | -0.6875              | -0.1223 | -0.2350 | -0.1145 | -0.2358 |
| 5   | 1-octanol                            | -0.6013              | -0.7757 | -0.9892 | -0.3941 | 0.4032  |
| 6   | 1-octen-3-ol                         | -1.0911              | -0.0296 | -0.1882 | 0.1132  | -0.1136 |
| 7   | 1-pentanol                           | -0.6244              | -0.0999 | -0.1416 | 0.1000  | -0.0497 |
| 8   | 2,4-decadien-1-OL                    | 0.1755               | 0.1416  | -0.2106 | -0.0856 | -0.0477 |
| 9   | Trans-2-Decen-1-OL                   | -0.7293              | -0.1928 | -0.3401 | 0.2305  | -0.0329 |
| 10  | Furfuryl alcohol                     | -0.4605              | -0.0716 | -0.0957 | 0.1058  | 0.0086  |
| 11  | 3-octanol                            | 0.6032               | 0.3239  | 0.2510  | -0.2938 | 0.4242  |
| 12  | 4-ethylcyclohexanol                  | -0.3957              | 0.2391  | -0.3171 | 0.1384  | -0.0426 |
| 13  | Cis-4-Heptenal                       | 0.7332               | -0.4633 | -0.3485 | -0.0785 | 0.0423  |
| 14  | (R)-(+)-2-methyl-1-phenyl-1-propanol | -0.6488              | -0.0916 | -0.1567 | 0.1731  | -0.1373 |
| 15  | 2-methylcyclohexanol                 | -0.4646              | 0.0375  | 0.0244  | 0.0958  | -0.0153 |
| 16  | Phenethyl alcohol                    | -0.2305              | -0.0195 | -0.0305 | 0.1132  | 0.0097  |
| 17  | Dimethylsilanediol                   | 0.5268               | 0.3943  | 0.2860  | -0.1243 | -0.0904 |
| 18  | N-formylpiperidine                   | -1.0911              | -0.0296 | -0.1882 | 0.1132  | -0.1136 |
| 19  | Gamma-nonanolactone                  | -0.5239              | -0.0353 | -0.0473 | 0.1580  | -0.0801 |
| 20  | Trans, Trans -2,4-decadienal         | -0.2414              | -0.0873 | -0.0629 | 0.1500  | -0.0705 |
| 21  | (2E,4E)-2,4-decanediinal             | 0.8647               | 0.4464  | 0.5924  | -0.1497 | 0.6214  |
| 22  | (E,E)-2,4-dodecadienal               | -1.0911              | -0.0296 | -0.1882 | 0.1132  | -0.1136 |
| 23  | Trans,trans-2,4-heptadienal          | -1.0911              | -0.0296 | -0.1882 | 0.1132  | -0.1136 |
| 24  | (E,E)-2,4-hexadienal                 | -0.6092              | 0.0479  | -0.0664 | 0.0145  | -0.2143 |
| 25  | Trans,trans-2,4-nonadienal           | 11.5610              | -2.7071 | 2.3932  | 4.8645  | -3.4813 |
| 26  | (2E,4E)-2,4-octadienal               | -1.0237              | -0.0469 | -0.1767 | 0.1434  | -0.1346 |
| 27  | Crotonaldehyde                       | -0.6554              | 0.0537  | -0.0907 | -0.1406 | -0.0072 |
| 28  | Trans-2-dodecenal                    | -0.6267              | -0.1554 | -0.2185 | 0.1006  | -0.2631 |
| 29  | 5-methyl furfural                    | 3.5831               | -0.3515 | 0.7728  | -0.4243 | -0.5535 |
| 30  | 2-propyl-2-heptenal                  | -0.6744              | -0.0563 | -0.1379 | 0.1079  | -0.1527 |
| 31  | 2-ethyl-2-hexenal                    | -0.1328              | 0.0821  | -0.1021 | -0.1206 | -0.1654 |
| 32  | (E)-2-Octenal                        | -0.6718              | -0.1681 | -0.2204 | 0.1126  | -0.1216 |
| 33  | (E)-2-butyl-2-enal                   | -0.7614              | -0.1230 | -0.1665 | 0.2657  | -0.2414 |
| 34  | Trans-2-Pentenal                     | -0.6410              | -0.2171 | -0.3995 | 0.0398  | -0.2687 |
| 35  | 2-Furanacrolein                      | -0.7415              | -0.0804 | -0.1469 | 0.1015  | -0.0987 |
| 36  | 2-Pyridinecarboxaldehyde             | -0.1697              | 0.3350  | 0.1691  | 0.1178  | 0.3298  |
| 37  | 2-Undecenal                          | -0.2357              | 0.1866  | 0.0004  | 0.1142  | 0.1423  |
| 38  | Trans-2-Undecenal                    | -0.4238              | 0.0362  | 0.0046  | 0.0644  | 0.0581  |
| 39  | 3-Cyclohexene-1-carboxaldehyde       | -0.3011              | -0.0659 | -0.2503 | 0.0272  | -0.2773 |
| 40  | 3-Furaldehyde                        | -0.8760              | -0.0436 | -0.1431 | 0.1503  | -0.1808 |
| 41  | 3-Hexen-2-One                        | -0.1127              | 0.0013  | -0.0133 | 0.0853  | 0.1432  |
| 42  | Trans-4-Nonenal                      | 0.1052               | 0.2250  | 0.4502  | 0.1247  | 0.6180  |
| 43  | 5-ethyl-2-furaldehyde                | 0.7772               | -0.4340 | 0.1921  | 1.0094  | 0.4590  |
| 44  | 5-Norbornene-2-                      | -0.3464              | -0.0503 | -0.2456 | -0.0616 | -0.2420 |

| No. | Compound                                                              | Principal components |         |         |         |         |
|-----|-----------------------------------------------------------------------|----------------------|---------|---------|---------|---------|
|     |                                                                       | 1                    | 2       | 3       | 4       | 5       |
|     | carboxaldehyde                                                        |                      |         |         |         |         |
| 45  | Benzaldehyde                                                          | -0.1608              | 0.0942  | 0.2985  | 0.2749  | 0.2823  |
| 46  | 2-Ethylbenzaldehyde                                                   | 0.0779               | -0.6799 | -0.2797 | 0.2154  | -0.5151 |
| 47  | Salicylaldehyde                                                       | -0.1627              | -0.1352 | 0.1912  | 0.2734  | -0.1438 |
| 48  | 4-Ethylbenzaldehyde                                                   | 0.4242               | -0.1434 | -0.4032 | 0.3755  | -0.1756 |
| 49  | Anisic aldehyde                                                       | -0.2032              | -0.1089 | 0.1080  | -0.2079 | -0.2155 |
| 50  | Phenylacetaldehyde                                                    | 0.0825               | 0.4497  | -0.1231 | 0.2690  | -0.2080 |
| 51  | Trans-Cinnamaldehyde                                                  | -0.1671              | -0.1514 | 0.0554  | -0.2251 | -0.2364 |
| 52  | Cis-4-Decenal                                                         | 0.0850               | 0.3576  | -0.4294 | 0.0313  | -0.1660 |
| 53  | (Z)-4-Undecenal                                                       | -0.8162              | 0.0652  | 0.0739  | 0.1432  | 0.1983  |
| 54  | Dodecyl aldehyde                                                      | -0.4177              | -0.1436 | -0.1764 | 0.0647  | -0.1100 |
| 55  | Furfural                                                              | -0.7588              | -0.0458 | -0.1824 | 0.0716  | -0.1971 |
| 56  | Heptaldehyde                                                          | -0.5802              | 0.0399  | 0.0575  | 0.2223  | 0.1693  |
| 57  | Caproaldehyde                                                         | 0.8795               | -1.2972 | 2.9141  | -1.0073 | 0.9962  |
| 58  | 1-Nonanal                                                             | 3.9494               | 3.8046  | -0.6938 | -2.2128 | -1.3707 |
| 59  | Octanal                                                               | -0.3240              | -0.2644 | -0.0784 | 0.4454  | -0.6835 |
| 60  | Valeraldehyde                                                         | -0.7200              | 0.0161  | -0.1609 | 0.1840  | -0.2694 |
| 61  | (E)-4-Undecenal                                                       | -0.8004              | -0.3243 | -0.0200 | 0.0979  | -0.0799 |
| 62  | Undecanal                                                             | -0.5571              | 0.3833  | -0.1264 | -0.1607 | -0.1969 |
| 63  | Trans-2-Octenoic acid                                                 | 0.1849               | -1.2284 | 2.5022  | -0.6666 | 0.4945  |
| 64  | 2-Hydroxycinnamic acid                                                | 3.0103               | 3.4786  | -0.2021 | -0.4088 | 0.8241  |
| 65  | Acetic acid glacial                                                   | 5.7561               | -8.0507 | -7.2167 | -2.2077 | 2.9532  |
| 66  | Benzoic acid                                                          | -0.5886              | -0.0382 | -0.1617 | 0.1963  | -0.2034 |
| 67  | (3R,4S)-1-Benzoyl-3-(1-methoxy-1-methylethoxy)-4-phenyl-2-azetidinone | -0.4442              | -0.6117 | 0.8677  | -0.2224 | 0.0513  |
| 68  | Isovaleric acid                                                       | 0.4265               | 0.9766  | -0.3005 | 0.3059  | 0.2436  |
| 69  | Geranic acid                                                          | -0.6376              | -0.3326 | -0.3750 | 0.2481  | -0.2774 |
| 70  | Heptanoic acid                                                        | 1.6389               | -3.4296 | 7.3237  | -2.3964 | 1.9555  |
| 71  | Hexanoic acid                                                         | 0.1796               | 0.4304  | -0.2681 | -0.6478 | -1.1259 |
| 72  | Capric acid                                                           | 0.2058               | -0.7860 | -0.1853 | 1.5831  | -0.9876 |
| 73  | Nonanoic acid                                                         | -0.6755              | 0.2620  | -0.2000 | 0.1904  | -0.0290 |
| 74  | Octanoic acid                                                         | -0.6608              | -0.4884 | 0.3576  | 0.0442  | -0.0204 |
| 75  | Valeric acid                                                          | -0.3686              | 0.6865  | -0.2110 | 0.1471  | 0.2333  |
| 76  | Propionic acid                                                        | -0.5088              | -0.6403 | 0.2886  | 0.0907  | -0.0324 |
| 77  | Trans-2-Decenoic acid                                                 | 0.0722               | 0.4149  | 0.4272  | 0.0036  | 0.2716  |
| 78  | Delta-Nonalactone                                                     | 0.0152               | 0.0585  | -0.4717 | 0.2025  | 0.2793  |
| 79  | Gamma-Octanoic lactone                                                | 1.1049               | -2.0313 | 3.8877  | -1.0967 | 0.8107  |
| 80  | 4-Hexanolide                                                          | 4.5933               | 5.2043  | -0.3368 | -0.3058 | 1.6802  |
| 81  | G-Decalactone                                                         | -0.2688              | -0.4560 | -0.6046 | 0.1839  | 0.1126  |
| 82  | 4-hydroxyoxolan-2-one                                                 | -0.5929              | -0.3638 | 0.4938  | -0.0172 | -0.0520 |
| 83  | 4-Heptanolide                                                         | 0.0078               | 0.6565  | -0.2028 | 0.2568  | 0.3282  |
| 84  | Dihydroactinidiolide                                                  | -0.5517              | -0.3672 | -0.4783 | 0.2024  | -0.1205 |
| 85  | δ-Lauro lactone                                                       | -0.7517              | -0.3793 | 0.1935  | 0.1020  | -0.0726 |

| No. | Compound                          | Principal components |         |         |         |         |
|-----|-----------------------------------|----------------------|---------|---------|---------|---------|
|     |                                   | 1                    | 2       | 3       | 4       | 5       |
| 86  | 5-Hexanolide                      | -0.0951              | 0.4878  | 0.1210  | -0.0654 | -0.0069 |
| 87  | 5-Decanolide                      | -0.3887              | 0.0906  | -0.2937 | 0.0625  | -0.0925 |
| 88  | 5-Hydroxyoctanoic acid lactone    | -0.6088              | -0.3179 | -0.2817 | 0.2656  | -0.1774 |
| 89  | (3Z)-3-Hexenyl benzoate           | -0.8972              | -0.0292 | -0.2208 | 0.2071  | -0.1112 |
| 90  | Vinyl acetate                     | -0.8572              | -0.3005 | 0.3477  | -0.0251 | 0.0070  |
| 91  | Hexyl benzoate                    | -0.2618              | 0.3058  | 0.4093  | -0.1703 | 0.2323  |
| 92  | Butyl benzoate                    | -0.0179              | 0.1053  | 0.0470  | -0.1182 | 0.1815  |
| 93  | Dibutyl phthalate                 | 0.0131               | 0.0505  | -0.1480 | 0.0878  | 0.0464  |
| 94  | Diethyl phthalate                 | -0.5233              | -0.0447 | -0.1726 | 0.1322  | -0.0832 |
| 95  | Dimethyl phthalate                | -0.2153              | -0.0616 | 0.3345  | -0.1174 | -0.0845 |
| 96  | Heptylformiat                     | 1.3582               | 1.3638  | -0.4798 | -0.5888 | -0.4309 |
| 97  | Methyl isoheptadecanoate          | 0.1137               | -1.1687 | -0.6805 | 0.0392  | 0.1380  |
| 98  | Pentyl hexanoate                  | -0.4749              | 0.1970  | -0.1305 | 0.0923  | -0.0076 |
| 99  | Methyl salicylate                 | -0.6084              | -0.0227 | -0.3040 | 0.1947  | -0.1627 |
| 100 | Hexanoic acid vinyl ester         | -0.9689              | -0.1493 | -0.1850 | 0.1487  | -0.1244 |
| 101 | Methyl 14-Methyl pentadecanoate   | -0.8658              | 0.1749  | -0.2007 | 0.0184  | -0.1445 |
| 102 | Cis-4-Decene                      | -0.8377              | -0.1408 | 0.1111  | -0.0999 | -0.1086 |
| 103 | Decane                            | -0.2499              | 0.1866  | 0.3902  | -0.1177 | 0.0709  |
| 104 | 3-Methyldecane                    | 0.2356               | 0.0209  | -0.3434 | 0.2249  | 0.1948  |
| 105 | Dodecane                          | -0.7230              | -0.2436 | 0.1607  | 0.1216  | -0.2226 |
| 106 | Heptane                           | 0.1532               | 0.4485  | 0.6446  | -0.6295 | -0.0411 |
| 107 | 1-Chloroheptane                   | 0.4151               | 0.5617  | -0.3611 | 0.1638  | 0.0089  |
| 108 | N-Octane                          | -0.0431              | -0.1615 | 0.3524  | 0.3193  | 0.4742  |
| 109 | 1,2-Epoxyheptane                  | 0.2850               | 1.0280  | -0.2773 | -0.8026 | -0.8445 |
| 110 | 1-Chloropentane                   | -0.2242              | -0.8596 | -0.6798 | 0.3443  | -0.1653 |
| 111 | 1-Nitropropane                    | -0.9865              | -0.0162 | -0.1678 | 0.1417  | -0.1096 |
| 112 | n-Tridecane                       | -0.7763              | -0.2803 | 0.2331  | 0.0593  | -0.0767 |
| 113 | 3-Methyltridecane                 | 0.4438               | 0.8869  | 0.2507  | -0.3748 | 0.0395  |
| 114 | 1-Octen-3-one                     | 1.1071               | 0.2302  | -0.6338 | -0.3167 | 0.0801  |
| 115 | 2(5H)-Furanone                    | 0.3228               | -0.6002 | -0.7161 | 0.2231  | -0.2036 |
| 116 | Beta-Angelica Lactone             | -0.2242              | -0.7530 | 1.0112  | -0.2904 | 0.2080  |
| 117 | 2-Cyclohexen-1-one                | 2.3408               | 2.6439  | -0.0217 | -1.1848 | -0.3312 |
| 118 | 2-Cyclopentenone                  | 1.0657               | -0.7102 | -0.8496 | -0.3482 | 0.2726  |
| 119 | 2-Decanone                        | 0.2595               | 0.3855  | -0.0714 | -0.1352 | -0.1649 |
| 120 | 2-Dodecanone                      | -0.1784              | -0.0250 | 0.0702  | 0.0373  | -0.0963 |
| 121 | 2-Heptanone                       | 0.3155               | 0.3530  | 0.2305  | -0.2373 | -0.0406 |
| 122 | 3-Methyl-5-Hexanone               | 0.4660               | -0.3440 | 0.1664  | 0.1131  | 0.1521  |
| 123 | 2-Hexanoylfuran                   | 0.2706               | 0.4794  | -0.3556 | 0.0151  | -0.0051 |
| 124 | Alpha-Pyrone                      | -0.6875              | -0.2503 | -0.3205 | 0.2357  | -0.3030 |
| 125 | 5-Hydroxy-2-Decenoic acid Lactone | -0.9440              | -0.1429 | -0.2132 | 0.2502  | -0.2011 |
| 126 | Delta-Heptalactone                | -1.0214              | -0.1184 | 0.0211  | 0.0406  | -0.0548 |
| 127 | 2-N-Hexylcyclopentanone           | 0.0822               | -0.4110 | -0.0385 | 1.0391  | -0.6355 |
| 128 | 2-Nonanone                        | -0.7371              | 0.0278  | -0.0981 | 0.0477  | -0.1051 |
| 129 | Hydroxyacetone                    | -0.4145              | -0.4977 | 0.7690  | -0.2337 | 0.0835  |
| 130 | 3-Decanone                        | -0.1891              | -0.1756 | -0.1764 | -0.0246 | 0.0554  |
| 131 | 3-Nonen-2-one                     | -0.3324              | -0.0154 | -0.2787 | 0.2471  | -0.0535 |
| 132 | 3-Octen-2-One                     | 0.0825               | -1.4596 | 2.4473  | -0.7793 | 0.6536  |
| 133 | trans-3-Penten-2-one              | 2.7685               | 3.5014  | 0.5051  | 2.0324  | 4.2842  |

| No. | Compound                                            | Principal components |         |         |         |         |
|-----|-----------------------------------------------------|----------------------|---------|---------|---------|---------|
|     |                                                     | 1                    | 2       | 3       | 4       | 5       |
| 134 | 3-Tridecanone                                       | -0.2153              | 0.9323  | -0.1888 | 0.6781  | 0.9984  |
| 135 | 4-Cyclopentene-1,3-Dione                            | -0.6165              | -0.1734 | 0.0608  | 0.1282  | -0.3706 |
| 136 | 2,3-Dihydro-3,5-dihydroxy-6-methyl-4(H)-pyran-4-one | -0.5854              | -0.1069 | -0.1664 | 0.1684  | 0.0305  |
| 137 | 4-Octanone                                          | -0.8793              | -0.0423 | -0.2583 | 0.2163  | -0.0075 |
| 138 | 6,10-Dimethyl-5,9-undecadien-2-one                  | -0.6200              | -0.0098 | 0.3015  | -0.3762 | -0.2530 |
| 139 | 2-Methylacetophenone                                | 0.6974               | 0.2941  | -0.1839 | -0.1593 | -0.3042 |
| 140 | Levogluconone                                       | 1.0936               | -0.7048 | -0.4806 | 1.2790  | -1.2418 |
| 141 | 3-Hydroxy-2-methyl-4H-pyran-4-one                   | -0.6835              | -0.0777 | 0.3328  | -0.3104 | -0.1777 |
| 142 | 4'-Hydroxypropiophenone                             | -0.2965              | 0.1424  | -0.2471 | 0.7404  | 0.1878  |
| 143 | Ethyl-O-Tolyl ketone                                | -0.9746              | -0.1091 | -0.1879 | 0.2487  | -0.2055 |
| 144 | 4-(2,6,6-Trimethyl-1-cyclohexenyl)-3-buten-2-one    | 0.9619               | -0.4579 | 2.5298  | -2.0200 | -0.2752 |
| 145 | Ocimene                                             | 2.5313               | 1.8983  | -0.9776 | 1.6635  | 3.4924  |
| 146 | 1-Decene                                            | 0.0922               | 0.3317  | 0.3240  | -0.9070 | -0.7255 |
| 147 | (+)-Alpha-Funebrene                                 | 0.4267               | -0.3206 | -0.1866 | 0.1272  | 0.1338  |
| 148 | 1-(2-methyl-1-cyclopentenyl)ethanone                | -0.5321              | -0.0427 | -0.0742 | 0.1971  | -0.1409 |
| 149 | 4-Chlorophenol                                      | -0.0221              | 0.6728  | -0.3010 | 0.0803  | 0.0401  |
| 150 | 2-Ethyl-6-Methylphenol                              | -0.3967              | -0.0531 | -0.0383 | 0.0076  | 0.0776  |
| 151 | 1-(2-Furyl)Butan-1-one                              | -1.0789              | -0.0452 | -0.1514 | 0.1005  | -0.1033 |
| 152 | 2-Methyl-5-Propionyl-Furan                          | -0.4309              | 0.0555  | 0.0462  | 0.0634  | 0.0469  |
| 153 | 5-Methyl-2-acetylfuran                              | -1.0324              | -0.0424 | -0.1912 | 0.1619  | -0.1318 |
| 154 | 2-Butylfuran                                        | -0.8447              | -0.2789 | -0.3459 | 0.1873  | -0.1298 |
| 155 | 2-N-Heptylfuran                                     | -0.7921              | -0.0322 | -0.1757 | 0.1188  | -0.1381 |
| 156 | 3-Acetyl-2,5-Dimethylfuran                          | -0.9663              | -0.0269 | -0.2190 | 0.0752  | -0.1950 |
| 157 | Dibenzofuran                                        | -0.4138              | -0.3940 | 0.3437  | 0.3639  | -0.2113 |
| 158 | 2-Ethylbenzofuran                                   | -0.2479              | -0.0560 | -0.0131 | 0.1426  | -0.1999 |
| 159 | 2-(2-Propenyl)furan                                 | -0.7061              | -0.0087 | -0.1411 | 0.0733  | -0.1829 |
| 160 | 2-Ethylfuran                                        | -0.6053              | 0.0229  | -0.0649 | 0.0416  | -0.0434 |
| 161 | 2-Ethyl-5-Methyl Furan                              | -0.6499              | 0.0561  | -0.0261 | 0.0918  | 0.0299  |
| 162 | 2-Hexylfuran                                        | -0.5842              | -0.2177 | -0.0684 | 0.0026  | -0.2940 |
| 163 | 2-Pentylfuran                                       | -0.8174              | -0.0856 | -0.1216 | 0.1954  | -0.1261 |
| 164 | 2-Propylfuran                                       | -0.8201              | -0.0498 | -0.1675 | 0.0983  | -0.1099 |
| 165 | 2,3-Dimethylmaleic anhydride                        | -1.0911              | -0.0296 | -0.1882 | 0.1132  | -0.1136 |
| 166 | Butylbenzene                                        | -0.8078              | -0.1492 | -0.1355 | 0.1748  | -0.2646 |
| 167 | Phenylpentane                                       | -0.9205              | -0.0597 | 0.0871  | 0.0686  | 0.0641  |
| 168 | Butyric anhydride                                   | 4.0624               | 1.8712  | -1.6815 | -4.9241 | -3.1032 |
| 169 | 1,7-Dimethylnaphthalene                             | -0.7621              | -0.5308 | -0.7263 | -0.2276 | 0.2335  |
| 170 | 1-Methylnaphthalene                                 | -0.7093              | -0.0852 | -0.1370 | 0.1586  | -0.1602 |
| 171 | O-Cymene                                            | 1.4332               | 0.4762  | -0.1753 | -0.4515 | 0.4367  |
| 172 | 2-N-Hexylthiophene                                  | 3.0219               | 0.3078  | -0.6573 | -0.8315 | 0.5465  |

| No. | Compound            | Principal components |        |        |        |         |
|-----|---------------------|----------------------|--------|--------|--------|---------|
|     |                     | 1                    | 2      | 3      | 4      | 5       |
| 173 | 2-N-Pentylthiophene | -0.1197              | 0.1076 | 0.0595 | 0.0011 | -0.0092 |

Table S4 Volatile component stereograms of six infant formula

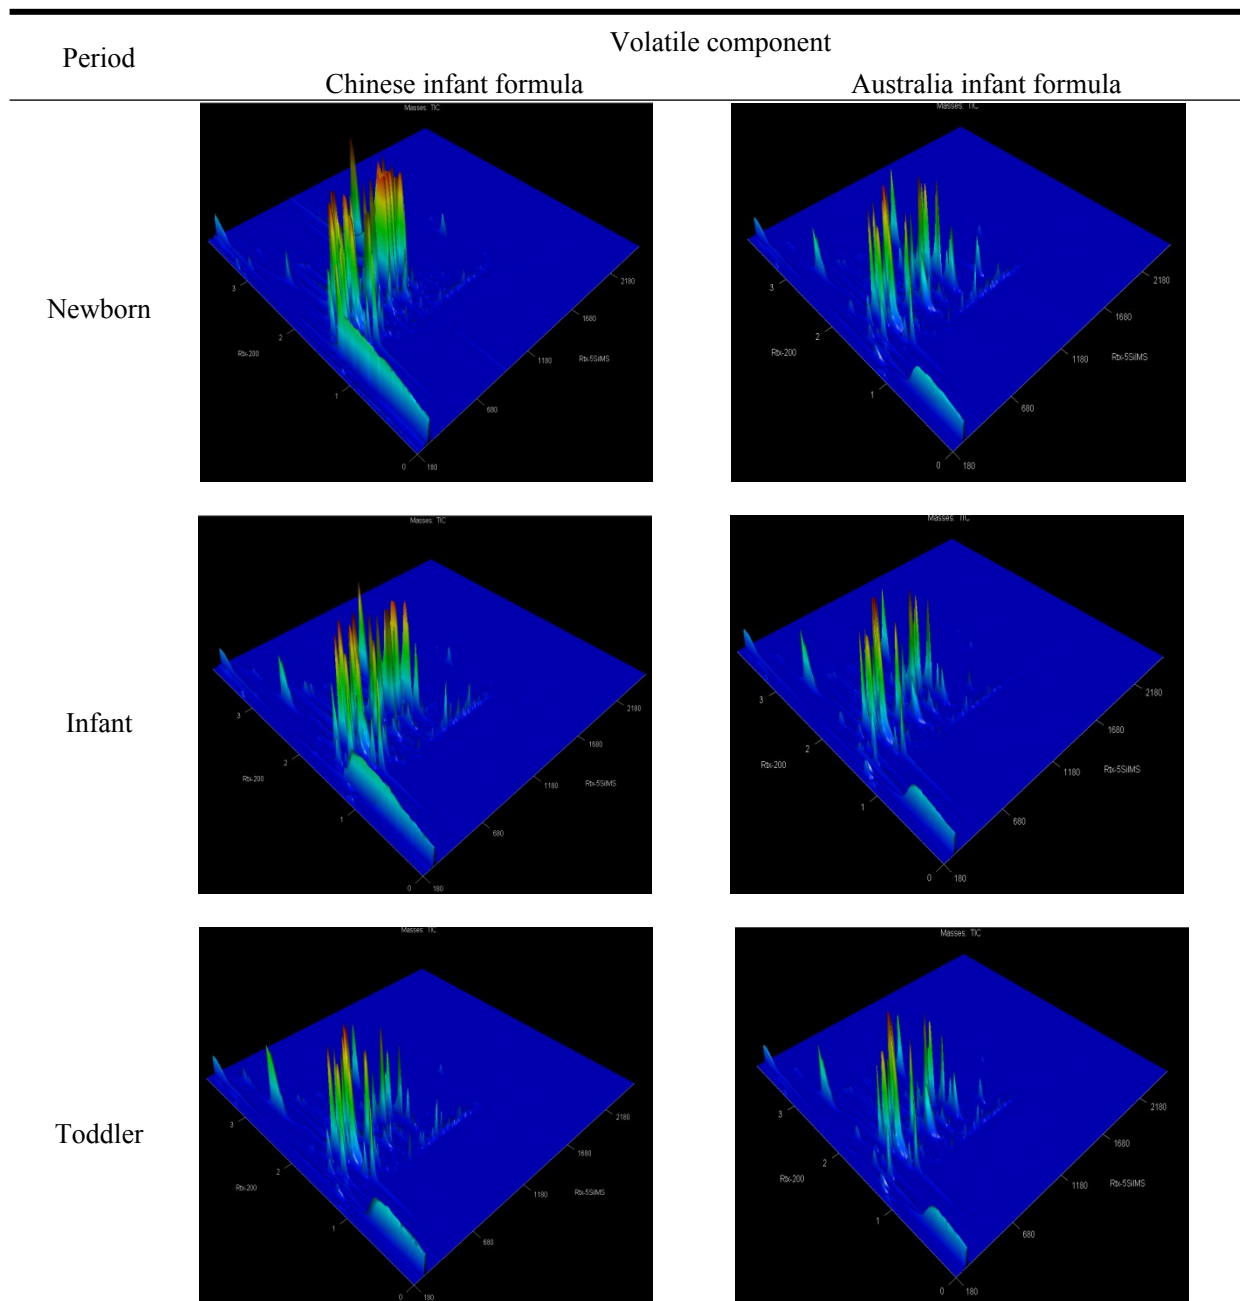

Note: The number and size of chromatography peak on behalf of the volatile component type and content
